1     **Distinguishing the signatures of local environmental filtering and**  
2             **regional trait range limits in the study of trait-environment**  
3                     **relationships.**

4                     Pierre DENELLE<sup>1</sup>, Cyrille VIOLLE<sup>1</sup>, François MUNOZ<sup>2</sup>

5

6     <sup>1</sup> CEFE UMR 5175, CNRS - Université de Montpellier - Université Paul-Valéry Montpellier –

7     EPHE -1919 route de Mende, F-34293 Montpellier, CEDEX 5, France

8     <sup>2</sup> University Grenoble-Alpes, LECA, 2233 Rue de la Piscine, 38041 Grenoble Cedex 9, France

9     Corresponding authors: Pierre Denelle – [pierre.denelle@gmail.com](mailto:pierre.denelle@gmail.com); Cyrille Violle -

10    [cyrille.violle@cefe.cnrs.fr](mailto:cyrille.violle@cefe.cnrs.fr); François Munoz – [fmunoz@univ-grenoble-alpes.fr](mailto:fmunoz@univ-grenoble-alpes.fr)

11

12    Numbers of words in the abstract: 298

13    Number of words in the main text: 5926

14    Number of references: 61

15    Number of Appendices: 11

16    **Key words:** community assembly, functional biogeography, environmental filtering

## 17 **Abstract**

18 Understanding the imprint of environmental filtering on community assembly along  
19 environmental gradients is a key objective of trait-gradient analyses. Depending on local  
20 constraints, this filtering generally entails that species departing from an optimum trait value have  
21 lower abundances in the community. The Community-Weighted Mean (CWM) and Variance  
22 (CWV) of trait values are then expected to depict the optimum and intensity of filtering,  
23 respectively. However, the trait distribution within the regional species pool and its limits can  
24 also affect local CWM and CWV values apart from the effect of environmental filtering. The  
25 regional trait range limits are more likely to be reached in communities at the extremes of  
26 environmental gradients. Analogous to the mid-domain effect in biogeography, decreasing CWV  
27 values in extreme environments can then represent the influence of regional trait range limits  
28 rather than stronger filtering in the local environment. We name this effect the “Trait-Gradient  
29 Boundary Effect” (TGBE). First, we use a community assembly framework to build simulated  
30 communities along a gradient from a species pool and environmental filtering with either  
31 constant or varying intensity while accounting for immigration processes. We demonstrate the  
32 significant influence of TGBE, in parallel to environmental filtering, on CWM and CWV at the  
33 extremes of the environmental gradient. We provide a statistical tool based on Approximate  
34 Bayesian Computation to decipher the respective influence of local environmental filtering and  
35 regional trait range limits. Second, as a case study, we reanalyze the functional composition of  
36 alpine plant communities distributed along a gradient of snow cover duration. We show that leaf  
37 trait convergence found in communities at the extremes of the gradient reflect an influence of  
38 trait range limits rather than stronger environmental filtering. These findings challenge

39 correlative trait-environment relationships and call for more explicitly identifying the  
40 mechanisms responsible of trait convergence/divergence along environmental gradients.

## 41 **Introduction**

42           Quantifying the physiological responses of organisms and communities along  
43 environmental gradients is pivotal in ecology and biogeography (Lomolino et al. 2006, Violle et  
44 al. 2014). However, we know little about the sensitivity of such responses to environmental or  
45 physiological limits, i.e. to boundary effects. Boundary effects have been broadly addressed in  
46 biogeography, in terms of taxonomic diversity at the limits of environmental gradients.  
47 Specifically, the mid-domain effect represents an artefactual peak of species richness at the center  
48 of latitudinal gradient (Colwell and Lees 2000, Colwell et al. 2004) or of species range at the  
49 center of an environmental gradient (Letten et al. 2013) due to sampling issues. Here we recast  
50 this hypothesis through the lens of trait-based ecology. More specifically, we argue that the  
51 parameters of the local trait distribution at the edge of environmental and/or trait gradients can be  
52 misinterpreted because the regional trait distribution is not properly quantified. While the  
53 influence of the taxonomic composition and richness of a source species pool on local  
54 community assembly have received much interest, the influence of the functional composition of  
55 the pool has only recently come to focus (Patrick and Brown 2018, Spasojevic et al. 2018). This  
56 influence, that we coined ‘trait-gradient boundary effect’ (TGBE), can combine with the effect of  
57 environmental filtering, as both constrain the moments of the local trait distribution at community  
58 scale (Kraft et al. 2015). We here provide a method to separate the influence of environmental  
59 filtering on local community assembly from the imprint of regional trait distribution, in order to  
60 avoid misinterpretations on the strength of environmental filtering.

61           Functional traits are attributes reflecting the ability of individuals to survive and  
62 reproduce in a local environment (Violle et al. 2007). Assembly processes shape the distribution  
63 of functional trait values within communities (McGill et al. 2006), and in particular

64 environmental filtering represents the control of the local trait distribution by abiotic factors  
65 (Kraft et al. 2015). Environmental filtering generally includes two components (Shipley 2010):  
66 (i) an optimal trait value or combination allowing maximal performance and greater abundance in  
67 the community, and (ii) an intensity value quantifying how sharp the decrease of species  
68 performance around the optimal trait value is (Fig. 1). Varying the functional composition of  
69 communities along environmental gradients is then expected to reflect changing optimal values  
70 and/or filtering intensity (Ackerly and Cornwell 2007). Because the variation of performance  
71 around the optimal value translates into a variation of species abundances related to trait values,  
72 the mean value of trait in communities (Community-Weighted Mean, CWM) and their variance  
73 (CWV) (Garnier et al. 2016) are expected to reflect local optimal trait value and filtering  
74 intensity, respectively (Cingolani et al. 2007, Violle et al. 2007, Enquist et al. 2015, Borgy et al.  
75 2017a). However, a clear relationship between trait-based statistics and the parameters of  
76 environmental filtering (“CWM-optimality” hypothesis, Muscarella and Uriarte 2016) may not  
77 always hold.

78         In extreme environments, more intense environmental filtering due to local constraints is  
79 commonly hypothesized (Weiher et al. 1998, Callaway et al. 2002, Cornwell et al. 2006), but the  
80 filtered trait values can also be closer to regional trait range limits. A reduction of variance in  
81 extreme environments can thus be allotted to either local environmental filtering or to larger-scale  
82 and longer-term constraints leading to a restricted trait variation among immigrants. Regional  
83 trait range limits should yield a decrease in local trait variance at the extremes of an  
84 environmental gradient and therefore entail a hump-shaped variation of CWV across the  
85 environmental gradient, even when the intensity of environmental filtering is constant throughout  
86 the gradient (Fig. 1). TGBE can also originate phenomenological relationships between CWM

87 and CWV because of the local convergence induced by the species pool limited trait range. Such  
88 hump-shaped patterns between CWM and CWV have been reported previously (Dias et al. 2013),  
89 and can reflect the influence of TGBE in real data. A major issue is then to determine whether  
90 lower trait variance in extreme environments reflects more intense filtering or the influence of  
91 trait limits at a regional scale. To solve the issue, we propose an inference approach that  
92 explicitly estimates the influences of regional trait range limits and local environmental filtering.

93 We investigated TGBEs in the context of a spatially-implicit model of community  
94 assembly representing how immigration from a species pool and local environmental filtering  
95 jointly shape local community composition (*ecolottery* package, Munoz et al. 2018) (Fig. 1).  
96 Environmental filtering is modeled as a Gaussian function determining the successful  
97 establishment of immigrants and thus defines a decrease of the performance of species around an  
98 optimum trait value, the intensity of the filtering being the standard deviation of the function  
99 (Webb et al. 2010, Shipley 2010, Enquist et al. 2015). An environmental gradient can then be  
100 viewed as a gradient of distinct optima imposed by distinct local environmental filters. When trait  
101 range limits among immigrants constrain the functional range in community composition, we  
102 expect reduced variance and a skewed local distribution with CWM deviating from optimal trait  
103 value (Fig. 1). We used the model to simulate community composition with explicit  
104 environmental filtering along an environmental gradient, with and without variation of filtering  
105 intensity. It illustrates how TGBEs can arise. In addition, we propose an Approximate Bayesian  
106 Computation approach based on intensive simulations of community composition to get an  
107 unbiased estimate of the optimum and intensity of environmental filtering, while controlling for  
108 the influence of TGBE. This powerful and mechanistic approach allows comparing the outputs of  
109 our community assembly model, with different sets of parameters related to distinct processes, to

110 the local trait patterns observed in a given community dataset, so as to unravel the causes  
111 originating them (Csilléry et al. 2010, Munoz et al. 2018). We applied the approach to examine  
112 TGBE and environmental filtering in alpine plant communities along a gradient of snow cover  
113 duration in the French Alps (Choler, 2005).

114

## 115 **Material and Methods**

### 116 *Framework of community assembly*

117 Immigrants drawn from a species pool establish and persist in a community depending on  
118 environmental filtering (Fig. 1). Each individual displays a synthetic fitness-related trait value,  $t$ ,  
119 and the probability of successful immigration decreases as  $t$  departs from an optimal trait value  
120  $t_{opt}$  depending on local environmental conditions (Shipley 2010). We used a Gaussian function of  
121  $t$  with mean  $t_{opt}$  and standard deviation  $\sigma_{opt}$  to represent this filtering.  $\sigma_{opt}$  depicts the intensity of  
122 environmental filtering: the smaller  $\sigma_{opt}$ , the narrower the extent of trait values allowing  
123 immigration in the local community (Munoz et al. 2018). Each community is then assigned  $t_{opt}$   
124 and  $\sigma_{opt}$  values characterizing local environmental filtering.

125 Our main objective is to disentangle the influence of (i) trait range limits in the species  
126 pool, denoted as  $a$  for the lower and  $b$  for the upper limit, and (ii) the parameters of  
127 environmental filtering denoted as  $t_{opt}$  and  $\sigma_{opt}$ , on the distribution of trait values in local  
128 communities. When  $t_{opt}$  is close to  $a$ , we expected that the distribution of trait values in the local  
129 community is limited below  $a$  (Fig. 1), and conversely when  $t_{opt}$  is close to  $b$ . In the following, we  
130 present the consequences of the regional trait limits on (i) the calculation of the first four

131 moments (Enquist et al. 2015) of the local trait distribution, and (ii) how these moments vary  
132 across communities along an environmental gradient.

133

#### 134 *Community-level trait based statistics*

135 Synthetic trait-based statistics are commonly used to characterize the functional response  
136 of communities. The two first moments of the distribution of trait values in a community,  
137 namely, the community weighted mean (CWM) and community weighted variance (CWV), are  
138 commonly used to analyze the functional structure of communities while the two following  
139 moments, community weighted skewness (CWS) and community weighted kurtosis (CWK) are  
140 more rarely considered (Enquist et al. 2015, Gross et al. 2017). The first four moments are  
141 expected to be influenced, among other processes, by environmental filtering and are often used  
142 for the inference of filtering (Shipley 2010, Enquist et al. 2015, Loranger et al. 2018). With a  
143 Gaussian environmental filtering (Fig. 1), we expect CWM and CWV to equal  $t_{opt}$  and  $\sigma_{opt}$ ,  
144 respectively. As a measure of 'peakedness', CWK should also increase with decreasing  $\sigma_{opt}$   
145 (Enquist et al. 2015, Gross et al. 2017). If the environmental filter is symmetrical, as considered  
146 here (Fig. 1), local CWS is not expected to deviate from 0.

147 When the trait range in the species pool is bounded and when the environment selects for  
148 trait values close to these boundaries, the local distribution of trait values is bounded beyond the  
149 limits of the pool, and is asymmetrical (Fig. 1). This asymmetry should entail a shift in CWM to  
150 larger values if the closer trait limit in the species pool is the lower boundary and to lower values  
151 if the closer limit is the upper boundary (Fig. 1). In addition, the trait limits should further reduce  
152 the range of values in local communities and thus reduce CWV (Fig. 1), increase CWK and



153 increase CWS in absolute value when  $t_{opt}$  is closer to the limits. In Appendix S1, we provide the  
154 mathematical formulas of the four moments, as a function of  $t_{opt}$ ,  $\sigma_{opt}$ , and of trait range limits  $a$   
155 and  $b$ , in a simple case where regional trait abundances are uniformly distributed between  $a$  and  
156  $b$ .

157

### 158 *Simulation of communities with environmental filtering and trait range limits*

159 We used a coalescent-based algorithm (package *ecolottery* in R language, Munoz et al.  
160 2018) to simulate community assembly with migrants drawn from a species pool and subject to a  
161 Gaussian environmental filtering. The coalescent-based approach reconstructs the shared ancestry  
162 of coexisting individuals (i.e., their genealogy) at present without simulating complete  
163 community dynamics from an initial state through time. The topology of the genealogy depends  
164 on immigration, environmental filtering, and demographic stochasticity (Munoz et al. 2018). We  
165 considered two types of species pools with either a uniform or a log-series distribution of  
166 abundances. Results were comparable with both distributions, and subsequent analyses will  
167 concern the case of uniform abundances only. A uniform pool includes 100 species with 1,000  
168 individuals per species, hence a total of 100,000 candidate immigrants. Species trait values  $t_i$   
169 were drawn from a uniform distribution between either  $a = 0$  and  $b = 1$  (trait range = 1), or  $a = 0$   
170 and  $b = 2$  (trait range = 2). We varied the range of trait values to assess the relative influence of  
171 filtering intensity and trait range. We also simulated a set of communities with intraspecific  
172 variation, i.e., with a standard deviation of trait values per species set to  $\sigma_i = 0.1$  in the species  
173 pool. The environmental filtering function determined the probability  $p$  of establishment of an  
174 individual with a trait value  $t$  according the following function:  $p = e^{-\left(\frac{t-t_{opt}}{\sigma_{opt}}\right)^2}$  (Fig. 1). We set

175 the intensity of environmental filtering, ruled by the parameter  $\sigma_{opt}$ , to either 0.25 or 0.05, to  
176 represent weak and intense environmental filtering, respectively, compared to the regional range  
177 of trait values varying between 0 and 1. For a given species pool, we simulated  $n = 100$   
178 communities, each including  $J = 500$  individuals, with varying  $t_{opt}$  values randomly drawn  
179 between  $a$  and  $b$ . The variation of  $t_{opt}$  represents a variation of optimal values along the  
180 environmental gradient.

181 We also considered another set of simulations where  $\sigma_{opt}$  varied along the gradient, with  
182 minimum values of  $\sigma_{opt} = 0.05$  at the extremes  $a$  and  $b$  towards a maximum of  $\sigma_{opt} = 0.25$  in the  
183 middle of the gradient. In this case, environmental filtering was more intense at the extremes of  
184 the gradient. We therefore designed two sets of simulated communities undergoing a fixed and  
185 varying environmental filtering, respectively. From these simulated data, local weighted  
186 moments were calculated and the environmental filtering parameters  $\hat{t}_{opt}$  and  $\hat{\sigma}_{opt}^2$  were  
187 estimated (see below). A repeatable example of community simulation is provided in Appendix  
188 S2.

189

### 190 ***ABC estimation of parameters of environmental filtering***

191 We performed an Approximate Bayesian Computation (ABC) analysis (Csilléry et al.  
192 2010, *coalesc\_abc* function in *ecolottery* R package) to estimate the parameters  $\hat{t}_{opt}$  and  $\hat{\sigma}_{opt}^2$  of  
193 environmental filtering from a given community composition. ABC provides posterior  
194 distributions of parameter estimates by comparing some summary statistics in communities  
195 simulated over a broad range of  $t_{opt}$  and  $\sigma_{opt}$  values, to the same summary statistic values in the  
196 given community (Csilléry et al. 2010). In our case, the summary statistics were metrics of

197 taxonomic (richness and Shannon diversity) and functional (CWM, CWV, CWS and CWK)  
198 composition of a community. Many communities were simulated in ABC analysis using the same  
199 coalescent-based algorithm presented above (package *ecolottery* in R language, Munoz et al.  
200 2018). In any case, simulated communities received immigrants from the same species pool. We  
201 also considered an alternative analysis where the summary statistics included functional  
202 dispersion (Laliberté and Legendre 2010) and Rao's quadratic entropy (Botta-Dukát 2005)  
203 instead of CWV, CWS and CWK (Appendix S10). Insofar as species pool composition was  
204 known, its trait range limits  $a$  and  $b$  were fixed based on the upper and lower trait range limits in  
205 the complete species pool. However, we also devised a case where the trait range limits and the  
206 species pool composition were based on the sum of observed communities (Appendix S11). The  
207 median values of  $\hat{t}_{opt}$  and  $\hat{\sigma}_{opt}^2$  in posterior distributions were compared to observed CWM and  
208 CWV values, respectively.

209 We performed ABC analysis on each of the simulated community presented above, to get  
210 a cross-validation of estimated  $\hat{t}_{opt}$  and  $\hat{\sigma}_{opt}^2$  values for simulated data with known  $t_{opt}$  and  $\sigma_{opt}^2$   
211 values. We also compared CWM and CWV in communities to  $t_{opt}$  and  $\sigma_{opt}^2$ . Figures 2b and 2d  
212 represent the variation in ABC estimates along a gradient of  $t_{opt}$  values. For simulations with  
213 fixed  $\sigma_{opt}^2$ , any variation in CWV at the extremes was expected to reveal an influence of regional  
214 trait limits only (TGBE). Conversely, we expected decreasing  $\hat{\sigma}_{opt}^2$  at the extremes of the  
215 gradient of  $t_{opt}$ , for the set of simulations where  $\sigma_{opt}^2$  was indeed smaller at the extremes. The  $\hat{t}_{opt}$   
216  $\sim \hat{\sigma}_{opt}^2$  relationship was also compared to the CWM  $\sim$  CWV relationship, to check the  
217 consistency of the variation in estimated environmental filtering parameters with  
218 phenomenological patterns of functional convergence measured with CWV (Appendix S3).

219

## 220 *Application to alpine plant communities*

221 We analyzed the variation in functional composition of plant communities along a  
222 gradient of snow cover duration in alpine grassland vegetation (Choler 2005). This gradient  
223 ranged from 140 to 210 days of snow cover in 1998. The alpine vegetation dataset (*aravo* in `ade4`  
224 R package) includes 75 communities for a total of 82 species, located between 2700 and 2750  
225 meters in French Alps. This vegetation undergoes harsh high-elevation conditions but also covers  
226 a broad environmental gradient of duration of snow cover, due to topographical and  
227 microclimatic heterogeneity (Choler 2005). The gradient determines varying abiotic stress and  
228 length of growing season, and thus largely influences functional trait variation among  
229 communities, such as leaf nitrogen concentration on a mass basis ( $N_{\text{mass}}$ ) and specific leaf area  
230 (SLA) (Choler 2005), which are two foliar traits characterizing the resource acquisition-  
231 conservation tradeoff in plants (Garnier et al. 2016). Long snow cover protects from freezing  
232 stress but reduces the length of growing season, which should favor resource-acquisitive plants,  
233 relatively to the local species pool, with higher  $N_{\text{mass}}$  and SLA. On the contrary, short snow cover  
234 increases exposure to wind and frost while increasing length of growing season, which should, in  
235 this specific context, favor resource-conservative plants with lower  $N_{\text{mass}}$  and SLA (Choler 2005).

236 We estimated parameters of environmental filtering  $t_{\text{opt}}$  and  $\sigma_{\text{opt}}$  for foliar traits in this  
237 dataset, and examined their variation along the gradient of snow cover duration. The species pool  
238 used in ABC analysis was built from the species present in all the observed communities.

239

## 240 **Results**

### 241 *TGBE in simulated communities*

242 We simulated communities along an environmental gradient with different  $t_{opt}$  values but  
243 constant filtering intensity  $\sigma_{opt}^2$  (Fig. 2). The variations in CWM and CWV illustrate the influence  
244 of TGBE. First, CWM went below  $t_{opt}$  when closer to the upper limit of trait range, and above  $t_{opt}$   
245 when closer to the lower limit (Fig. 2a). The observed range of CWM values was thereby smaller  
246 than the range of  $t_{opt}$ . Second, we found a hump-shaped variation in CWV, with lower values at  
247 the extremes of the  $t_{opt}$  gradient (Fig. 2c). CWS and CWK also varied along the  $t_{opt}$  gradient with  
248 a decrease in CWS and an increase in CWK towards the extremes (Appendix S5). Because  
249 filtering intensity was set constant, the reduction of CWV at the extremes, and the respective  
250 variations of CWS and CWK, was attributable to the influence of trait range limits in the species  
251 pool (Fig. 1). We obtained consistent results under more intense but constant environmental  
252 filtering ( $\sigma_{opt} = 0.05$ , Appendix S4, more contrasted), with intraspecific variability (Appendix S6,  
253  $\sigma = 0.1$ ), with log-series distribution of regional abundances (Appendix S7) and when using the  
254 sum of observed communities as a species pool (Appendix S11).

255 We expected the influence of TGBE to extend farther from the extremes when  $\sigma_{opt}^2$  was  
256 larger for a fixed range  $[a; b]$ . The extent of the influence of regional trait limits was thereby  
257 expected to depend on the intensity of local filtering relatively to trait range  $[a; b]$ . Appendix S8  
258 shows how the ratio of  $\sigma_{opt}^2$  and trait range influences the deviation of CWM from  $t_{opt}$ . It shows  
259 that the ratio of trait range  $(b - a)$  and filtering intensity ( $\sigma_{opt}^2$ ) determines the influence of TGBE  
260 along the gradient. For instance,  $\sigma_{opt} = 0.5$  and  $[0; 1]$  trait range gives the same deviation than  $\sigma_{opt}$   
261  $= 1$  and  $[0; 2]$  trait range.

262

263 ***Deciphering environmental filtering and TGBE in extreme environments***

264 In communities where filtering intensity was set constant, we obtained unbiased  
265 estimation of  $t_{opt}$  (Fig. 2b, slope coefficient of the regression between  $\hat{t}_{opt}$  and  $t_{opt} = 0.97$ ), and  
266 unbiased and constant estimation of  $\sigma_{opt}$ , while there was variation in CWV due to TGBE (Fig.  
267 2d). Indeed, the square distance between  $\sigma_{opt}^2$  and  $\hat{\sigma}_{opt}^2$  was, in average, twice low over the  $t_{opt}$   
268 gradient (Fig. 2d) than the square distance between  $\sigma_{opt}^2$  and CWV (Fig. 2c) ( $8.91e-3$  and  $2.23e-2$   
269 respectively). When using other metrics than CWV to evaluate local functional convergence and  
270 to estimate  $t_{opt}$  and  $\sigma_{opt}^2$ , namely functional dispersion and Rao's quadratic entropy, we obtained  
271 similar results with significant quadratic relationships between these metrics and  $t_{opt}$  along  $t_{opt}$   
272 gradient while the environmental filtering intensity remained constant (Appendix S10). In  
273 addition, we simulated an environmental gradient where filtering was more intense at the  
274 extremes (i.e., smaller  $\sigma_{opt}$  value, black line on Fig. 3a and 3b). Figure 3d shows that the  
275 estimated value of  $\sigma_{opt}$  followed the expected variation of filtering intensity. In this case, CWV  
276 also displayed a hump-shaped pattern along the gradient, similar to Figure 2c, but here this was  
277 due to both regional trait limits and actual variation in filtering intensity.

278 Therefore, the variation in CWV could not inform on the respective influences of  
279 environmental filtering and trait range limits in the pool (Fig. 1c, Fig. 3c), while the ABC-based  
280 estimation of  $\sigma_{opt}^2$  allowed grasping the specific influence of environmental filtering.

281

### 282 ***TGBE and environmental filtering in alpine plant communities***

283 We estimated  $t_{opt}$  and  $\sigma_{opt}^2$ , and the variations in CWV and CWM values of foliar traits in  
284 alpine plant communities (Figs. 4 & 5). As expected with TGBE, CWM departed from estimated  
285  $\hat{t}_{opt}$  in extreme environmental conditions, and the range of  $t_{opt}$  values was larger than the range of

286 CWM values (Fig. 4ab & 5ab). CWV decreased at lowest duration (great exposure to cold) for  
287 both SLA and  $N_{\text{mass}}$  and at highest duration (short vegetative period) of snow cover for  $N_{\text{mass}}$  only  
288 (Fig. 4). On the contrary, ABC-based estimations showed that  $\widehat{\sigma}_{opt}^2$  did not vary along the snow  
289 cover gradient (Fig. 4cd & 5cd). Except for SLA at long snow cover duration (Fig. 5cd),  $\widehat{\sigma}_{opt}^2$   
290 was larger than the corresponding CWV.

291 In addition, departure of community weighted skewness (CWS) from 0 reflected the  
292 influence of regional trait limits and asymmetry in local trait distribution, as observed in  
293 simulated communities with constant  $\sigma_{opt}$  (Appendix S5). In alpine plant communities,  
294 increasingly negative community weighted skewness (CWS) with increasing snow cover duration  
295 in alpine vegetation was consistent with an influence of an upper trait limit on the local  
296 distribution of  $N_{\text{mass}}$  and SLA at longest snow cover duration (Appendix S9).

297

298

## 299 **Discussion**

300 In ecology and biogeography, trait-gradient analyses examine the functional trait  
301 distributions in communities to characterize community responses along environmental gradients  
302 (Ackerly and Cornwell 2007, Lepš et al. 2011, Garnier et al. 2016, Borgy et al. 2017a). Here we  
303 showed that a reduced variance of the local trait distribution, i.e., trait convergence, can reflect a  
304 combined influence of local environmental constraints within the community and of a bounded  
305 trait distribution in the regional species pool. These two influences need to be disentangled in  
306 order to identify the specific role of local environmental filtering. However, while much  
307 emphasis has been put on the idea that environmental filtering can be more intense at the

308 extremes of environmental gradients (Weiher et al. 2011), far less attention has been devoted to  
309 how the functional composition of species pools influences local community composition  
310 (Spasojevic et al. 2018). To address the issue, we used a simulation-based, Approximate  
311 Bayesian Computation (ABC) approach (*ecolottery* package, Munoz et al. 2018). By explicitly  
312 modelling immigration and environmental filtering, the approach allows separating out the  
313 influence of constraints on trait distributions at species pool and local community levels. With  
314 this approach, we can obtain unbiased estimation of  $t_{opt}$  and  $\sigma_{opt}$  in simulated communities along  
315 gradients. The mid-domain effect is a better-known example of the influence of regional limits  
316 (of species niches and distributions) influencing local taxonomic diversity at the extremes of  
317 gradients (in geographical, Colwell and Lees 2000, or environmental space, Letten et al. 2013).  
318 The TGBE issue presented here extends this perspective to examine how trait range limits in  
319 species pools influence functional composition in local communities. We discuss the  
320 consequences of TGBE for trait-based approaches in functional ecology, community ecology and  
321 (functional) biogeography.

322 Environmental filtering is often viewed as a humped filtering function along a niche axis,  
323 similar to a Gaussian function with optimal value  $t_{opt}$  and filtering intensity  $\sigma_{opt}$ . Although  
324 environmental filtering generally concerns the influence of abiotic constraints (Kraft et al. 2015),  
325 the framework proposed here can apply to any filtering around an optimal trait value  $t_{opt}$   
326 conferring, e.g., greater competitive ability (Mayfield and Levine 2010), better colonization or  
327 chances of establishment (Ehrlén and Eriksson 2000, Bernard-Verdier et al. 2012). The current  
328 paradigm in functional ecology is that community weighed mean (CWM) is a proxy for  $t_{opt}$ , the  
329 “CWM-optimality” hypothesis (Muscarella and Uriarte 2016), and that community weighed  
330 variance (CWV) is a proxy for  $\sigma_{opt}^2$  under environmental filtering. The “CWM-optimality”



331 hypothesis found some support in recent studies linking the distance between species' traits and  
332 CWM to species' abundances for single traits (Umaña et al. 2015) or multivariate measures  
333 (Muscarella and Uriarte 2016), but was challenged in other contexts (Mitchell et al. 2017,  
334 Laughlin et al. 2018). CWM can be disconnected from  $t_{opt}$  when stabilizing mechanisms such as  
335 competitive interactions and limiting similarity break the linkage of trait values with fitness  
336 differences (Chesson 2000, Adler et al. 2013), or when neutral stochastic dynamics affect species  
337 abundance independently from trait values (Hubbell 2001). Here we challenge the CWM-  
338 optimality hypothesis by demonstrating that CWM and CWV can depart from  $t_{opt}$  and  $\sigma_{opt}^2$ ,  
339 respectively, when the local distribution is bounded due to trait range limits in the pool of  
340 immigrants. The distribution of trait values in the regional species pool therefore influences local  
341 community assembly (Patrick and Brown 2018, Spasojevic et al. 2018) and can challenge the  
342 CWM-optimality hypothesis by preventing CWM to reach the optimum for certain environments.  
343 It is likely that trait range limits of the species pool are reached in extreme environments, i.e. trait  
344 values required for persistence are not possible, due to physiological limits or evolutionary  
345 history (Koch et al. 2004, Alpert 2005). It is essential to distinguish the respective signatures of  
346 local environmental filtering and of processes driving the functional composition of species pools  
347 at a larger scale and over a long term (Jiménez-Alfaro et al. 2018). Consequently, identifying  
348 TGBEs means determining the specific influence of local community assembly amidst the  
349 influence of large-scale and long-term evolutionary legacy (Lessard et al. 2016).

350 We found that TGBE can be responsible of a hump-shaped variation in CWV along  
351 environmental gradients even when the intensity of environmental filtering is constant (Fig. 2c).  
352 TGBE also generated a hump-shaped relationship between CWV and CWM (Appendix S3),  
353 similar to patterns reported in a previous study (Dias et al. 2013). Although a link between CWM

354 and CWV (or similar functional diversity metrics) can represent a statistical artifact (Ricotta and  
355 Moretti 2011, Dias et al. 2013), our study also shows that TGBE can yield this relationship. The  
356 analysis of alpine plant communities illustrated trait variance reduction in extreme environmental  
357 conditions (Fig. 4 & 5), while the estimated  $\widehat{\sigma}_{opt}^2$  did not show reduction. Variance reduction  
358 could thus be due to TGBE and not to more intense environmental filtering in these alpine plant  
359 communities (Fig. 4). Similarly, the  $\widehat{t}_{opt}$ -environment relationships had a steeper slope than the  
360 CWM-environment relationship (Fig. 2, Fig. 4ab & Fig. 5ab), suggesting that CWM did not  
361 represent optimal trait values all along the environmental gradient.

362         We have proposed a spatially-implicit framework of community assembly acknowledging  
363 immigration from a species pool and local environmental filtering (Munoz et al. 2018). The  
364 definition of the pool is flexible and several options have been proposed, either based on a  
365 regional list of species (Zobel 1997), on the complete composition of a metacommunity (Leibold  
366 et al. 2004), or on a spatially restricted source of dispersers (Lessard et al. 2016). The pool can  
367 represent an external forcing based on long-term and large-scale regional dynamics (top-down  
368 perspective as in Hubbell 2001) or reflect the emergent composition of available immigrants in a  
369 metacommunity (bottom-up perspective, Leibold et al. 2004, Mittelbach and Schemske 2015). In  
370 both cases, its composition illustrates the influence of long-term assembly dynamics across  
371 communities in a specific area, and its boundaries represent the limits imposed by these  
372 processes. In the present analyses, while we simulated and used the composition of complete  
373 species pools in ABC analyses of simulated communities, the species pool of alpine communities  
374 was based on the sum of sampled communities (see in Appendix S11 the results for simulations  
375 with a species pool based on the sum of sampled communities). The composition and the relative  
376 abundances considered in the reference species pool can greatly influence analyses of community

377 assembly dynamics (Lessard et al. 2011). Dark diversity, representing the species that are absent  
378 from the pool but could contribute to immigration and community assembly (Pärtel et al. 2011),  
379 can extend trait range limits in the reference species pool. Further investigation of the influence  
380 of trait range limits with different definitions of the species pool should help address under which  
381 conditions TGBE can be reliably detected. Furthermore, the influence of the shape of the trait  
382 distribution in the pool should be addressed in more details in the future (Spasojevic et al. 2018)  
383 and appears essential since it can vary from a biogeographical context to another even though  
384 local environmental filtering can operate in a similar way. For sake of simplicity, we considered a  
385 uniform distribution of trait values among species at regional scale, and two types of distribution  
386 of regional abundances, uniform and log-series. Even though the results were robust to some  
387 variation in these parameters, further investigation of the sensitivity of the model will be needed.  
388 Lastly, we defined environmental filtering in our study as a Gaussian function around a single  
389 optimum (Shipley 2010). However, other filtering functions, such as disruptive filtering with two  
390 modes yielding trait divergence (Loranger et al. 2018), could be considered to study trait patterns  
391 at the community level, and are already implemented in *ecolottery* R package (Munoz et al.  
392 2018).

393         Independently from the assumptions mentioned above, the way CWM and CWV deviate  
394 from  $t_{opt}$  and  $\sigma_{opt}^2$  due to TGBE depends on the ratio between the trait range limits and the  
395 strength of local environmental filtering along a gradient (Appendix S8). In a biogeographical  
396 perspective, a physiological trait ~ environment relationship could yield different patterns of  
397 CWM and CWV variation across regions where distinct biogeographical histories entailed  
398 different range limits (Forrestel et al. 2017). Moreover, for a given regional species pool, the  
399 influence of TGBE should change depending on the strength of local environmental filtering.

400 Therefore, when the filtering acting on a specific trait is strong, the deviation should concern only  
401 communities closest to the extremes. The influence of TGBE on trait ~ environment relationship  
402 can also differ across functional traits, depending on the nature of underlying filters acting on  
403 different traits (Borgy et al. 2017b). The detection and influence of TGBE will therefore be  
404 dependent upon the interplay of biogeographical history and the local mechanisms filtering, with  
405 certain intensity, trait values.

406 ABC-based estimation of environmental filtering relies on simulating and comparing  
407 basic statistics that summarize the observed and simulated trait distributions. The moments of  
408 local trait distributions can be used as summary statistics to infer the trait-based assembly  
409 processes, as advocated by the Trait Driver Theory (TDT) (Enquist et al. 2015). While much  
410 emphasis has been put on analyzing the two first moments CWM and CWV, TDT underlines that  
411 the next moments, skewness (CWS) and kurtosis (CWK), also convey insights on assembly  
412 dynamics. Gross et al. (2017) emphasized that CWS and CWK allow better characterizing the  
413 coexistence of multiple functional strategies beyond the influence of a single optimum. We  
414 showed that TGBE strongly impacts CWV variations (Figs. 1, 2c and 2d) but also other moments  
415 (Appendices S5 and S9). As a consequence, applying TDT along gradients also probably implies  
416 addressing TGBE issues. Community-level metrics are more and more used to characterize the  
417 functional composition of communities of plants (Violle et al. 2007), but also other organisms  
418 (e.g., Newbold et al. 2012, Fierer et al. 2014, Pey et al. 2014). We stress here that these metrics  
419 should not be viewed as direct proxies of underlying assembly processes, especially in harsh  
420 environmental conditions that are the focus of much research and where TGBE more likely  
421 occurs. Furthermore, acknowledging intraspecific variation in trait-based community analyses  
422 has gained much momentum in recent years (Lepš et al. 2011, Violle et al. 2012, Siefert et al.

423 2015). Having intraspecific trait variation could extend beyond the trait limits of a pool defined  
424 based on trait values averaged at species level (Violle et al. 2012), which should affect associated  
425 trait range limits and therefore TGBE. Our individual-based modelling framework can  
426 acknowledge the influence of intraspecific trait variation in community dynamics (Appendix S6),  
427 but these data are mostly unavailable at large spatial scales of functional biogeography, so that  
428 trait values averaged at species level are still mainly used in practice (Borgy et al. 2017b).

429 Community-level trait metrics are common currencies for functional biogeography  
430 (Violle et al. 2014). They can be used to elucidate the drivers of taxonomic diversity patterns  
431 (Lamanna et al. 2014) as well as to target conservation areas (Violle et al. 2017) or to map and  
432 predict ecosystem properties from landscape to regional and global scales (Violle et al. 2015).  
433 The approach is primarily based on the “CWM-optimality” hypothesis (Muscarella and Uriarte  
434 2016), and the idea that CWV reflects the intensity of the local environmental filtering. Other  
435 processes can affect local community assembly and functional composition (Hubbell 2001,  
436 Levine and Murrell 2003, Mayfield and Levine 2010, Muscarella and Uriarte 2016), and our  
437 work further underlines that the functional composition of the species pool providing immigrants  
438 is influential. Taking into account the functional diversity of the species pool, and acknowledging  
439 the underlying biogeographical and evolutionary dynamics, is an important issue that has only  
440 recently come to focus (Patrick and Brown 2018, Spasojevic et al. 2018). TGBE shows the need  
441 to better integrate local and regional dynamics when examining the functional composition of  
442 local communities. Therefore, ecologists need to be aware of TGBE when interpreting patterns of  
443 functional composition and their causes, notably at the extremes of environmental gradients.

444

## 445 **Declarations**

446 *Acknowledgements*

447 This study was supported by the European Research Council (ERC) Starting Grant Project  
448 ‘Ecophysiological and biophysical constraints on domestication in crop plants’ (Grant ERC-StG-  
449 2014-639706-CONSTRAINTS and by the French Foundation for Research on Biodiversity  
450 (FRB; [www.fondationbiodiversite.fr](http://www.fondationbiodiversite.fr)) in the context of the CESAB project ‘Causes and  
451 consequences of functional rarity from local to global scales’ (FREE).

452 *Data Accessibility*

453 R code to generate the simulated data is provided in Appendix S2 and is archived on a Zenodo  
454 URL link: <https://zenodo.org/record/1165400>.

455 The *aravo* dataset describing alpine plant communities is available in the *ade4* R package and is  
456 described in Choler (2005).

457

## 458 **References**

- 459 Ackerly, D. D. and Cornwell, W. K. 2007. A trait-based approach to community assembly: partitioning of  
460 species trait values into within- and among-community components. - *Ecol. Lett.* 10: 135–145.
- 461 Adler, P. B. et al. 2013. Trait-based tests of coexistence mechanisms. - *Ecol. Lett.* 16: 1294–1306.
- 462 Alpert, P. 2005. The Limits and Frontiers of Desiccation-Tolerant Life1. - *Integr. Comp. Biol.* 45: 685–695.
- 463 Bernard-Verdier, M. et al. 2012. Community assembly along a soil depth gradient: contrasting patterns of  
464 plant trait convergence and divergence in a Mediterranean rangeland (H Cornelissen, Ed.). - *J. Ecol.* 100:  
465 1422–1433.
- 466 Borgy, B. et al. 2017a. Sensitivity of community-level trait–environment relationships to data  
467 representativeness: A test for functional biogeography. - *Glob. Ecol. Biogeogr.* 26: 729–739.
- 468 Borgy, B. et al. 2017b. Plant community structure and nitrogen inputs modulate the climate signal on leaf  
469 traits. - *Glob. Ecol. Biogeogr.* 26: 1138–1152.
- 470 Botta-Dukát, Z. 2005. Rao’s quadratic entropy as a measure of functional diversity based on multiple  
471 traits. - *J. Veg. Sci.* 16: 533–540.
- 472 Callaway, R. M. et al. 2002. Positive interactions among alpine plants increase with stress. - *Nature* 417:  
473 844–848.
- 474 Chesson, P. 2000. Mechanisms of maintenance of species diversity. - *Annu. Rev. Ecol. Syst.*: 343–366.
- 475 Choler, P. 2005. Consistent Shifts in Alpine Plant Traits along a Mesotopographical Gradient. - *Arct.*  
476 *Antarct. Alp. Res.* 37: 444–453.
- 477 Cingolani, A. M. et al. 2007. Filtering processes in the assembly of plant communities: Are species  
478 presence and abundance driven by the same traits? - *J. Veg. Sci.* 18: 911–920.
- 479 Colwell, R. K. and Lees, D. C. 2000. The mid-domain effect: geometric constraints on the geography of  
480 species richness. - *Trends Ecol. Evol.* 15: 70–76.
- 481 Colwell, R. K. et al. 2004. The Mid-Domain Effect and Species Richness Patterns:What Have We Learned  
482 So Far? - *Am. Nat.* 163: E1–E23.
- 483 Cornwell, W. K. et al. 2006. A trait-based test for habitat filtering: Convex hull volume. - *Ecology* 87:  
484 1465–1471.
- 485 Csilléry, K. et al. 2010. Approximate Bayesian computation (ABC) in practice. - *Trends Ecol. Evol.* 25: 410–  
486 418.
- 487 Dias, A. T. C. et al. 2013. An experimental framework to identify community functional components  
488 driving ecosystem processes and services delivery (S Lavorel, Ed.). - *J. Ecol.* 101: 29–37.
- 489 Ehrlén, J. and Eriksson, O. 2000. Dispersal limitation and patch occupancy in forest herbs. - *Ecology* 81:  
490 1667–1674.

- 491 Enquist, B. J. et al. 2015. Chapter Nine-Scaling from Traits to Ecosystems: Developing a General Trait  
492 Driver Theory via Integrating Trait-Based and Metabolic Scaling Theories. - *Adv. Ecol. Res.* 52: 249–318.
- 493 Fierer, N. et al. 2014. Seeing the forest for the genes: using metagenomics to infer the aggregated traits  
494 of microbial communities. - *Front. Microbiol.* 5:614.
- 495 Forrestel, E. J. et al. 2017. Different clades and traits yield similar grassland functional responses. - *Proc.*  
496 *Natl. Acad. Sci.* 114: 705–710.
- 497 Garnier, E. et al. 2016. *Plant functional diversity: organism traits, community structure, and ecosystem*  
498 *properties.* - Oxford University Press.
- 499 Gross, N. et al. 2017. Functional trait diversity maximizes ecosystem multifunctionality. - *Nat. Ecol. Evol.*  
500 1: 0132.
- 501 Hubbell, S. P. 2001. *The unified neutral theory of biodiversity and biogeography* Princeton University  
502 Press Princeton.
- 503 Jiménez-Alfaro, B. et al. 2018. History and environment shape species pools and community diversity in  
504 European beech forests. - *Nat. Ecol. Evol.*: 1.
- 505 Koch, G. W. et al. 2004. The limits to tree height. - *Nature* 428: 851.
- 506 Kraft, N. J. B. et al. 2015. Community assembly, coexistence and the environmental filtering metaphor (J  
507 Fox, Ed.). - *Funct. Ecol.* 29: 592–599.
- 508 Laliberté, E. and Legendre, P. 2010. A distance-based framework for measuring functional diversity from  
509 multiple traits. - *Ecology* 91: 299–305.
- 510 Lamanna, C. et al. 2014. Functional trait space and the latitudinal diversity gradient. - *Proc. Natl. Acad.*  
511 *Sci.* 111: 13745–13750.
- 512 Laughlin, D. C. et al. 2018. Survival rates indicate that correlations between community-weighted mean  
513 traits and environments can be unreliable estimates of the adaptive value of traits. - *Ecol. Lett.* 21: 411-  
514 421.
- 515 Leibold, M. A. et al. 2004. The metacommunity concept: a framework for multi-scale community ecology:  
516 The metacommunity concept. - *Ecol. Lett.* 7: 601–613.
- 517 Lepš, J. et al. 2011. Community trait response to environment: disentangling species turnover vs  
518 intraspecific trait variability effects. - *Ecography* 34: 856–863.
- 519 Lessard, J.-P. et al. 2011. Strong influence of regional species pools on continent-wide structuring of local  
520 communities. - *Proc. R. Soc. Lond. B Biol. Sci.*: rspb20110552.
- 521 Lessard, J.-P. et al. 2016. Process-based species pools reveal the hidden signature of biotic interactions  
522 amid the influence of temperature filtering. - *Am. Nat.* 187: 75.
- 523 Letten, A. D. et al. 2013. The mid-domain effect: it's not just about space (R Pearson, Ed.). - *J. Biogeogr.*  
524 40: 2017–2019.



- 525 Levine, J. M. and Murrell, D. J. 2003. The community-level consequences of seed dispersal patterns. -  
526 *Annu. Rev. Ecol. Evol. Syst.* 34: 549–574.
- 527 Lomolino, M. V. et al. 2006. *Biogeography*. - Sinauer Associates Sunderland, MA.
- 528 Loranger, J. et al. 2018. What makes trait–abundance relationships when both environmental filtering  
529 and stochastic neutral dynamics are at play? - *Oikos* in press.
- 530 Mayfield, M. M. and Levine, J. M. 2010. Opposing effects of competitive exclusion on the phylogenetic  
531 structure of communities: Phylogeny and coexistence. - *Ecol. Lett.* 13: 1085–1093.
- 532 McGill, B. et al. 2006. Rebuilding community ecology from functional traits. - *Trends Ecol. Evol.* 21: 178–  
533 185.
- 534 Mitchell, R. M. et al. 2017. Species’ traits do not converge on optimum values in preferred habitats. -  
535 *Oecologia*: 1–11.
- 536 Mittelbach, G. G. and Schemske, D. W. 2015. Ecological and evolutionary perspectives on community  
537 assembly. - *Trends Ecol. Evol.* 30: 241–247.
- 538 Munoz, F. et al. 2018. ecolottery: Simulating and assessing community assembly with environmental  
539 filtering and neutral dynamics in R. - *Methods Ecol. Evol.* 9: 693–703.
- 540 Muscarella, R. and Uriarte, M. 2016. Do community-weighted mean functional traits reflect optimal  
541 strategies? - *Proc. R. Soc. B Biol. Sci.* 283: 20152434.
- 542 Newbold, T. et al. 2012. Mapping Functional Traits: Comparing Abundance and Presence-Absence  
543 Estimates at Large Spatial Scales (F de Bello, Ed.). - *PLoS ONE* 7: e44019.
- 544 Pärtel, M. et al. 2011. Dark diversity: shedding light on absent species. - *Trends Ecol. Evol.* 26: 124–128.
- 545 Patrick, C. J. and Brown, B. L. 2018. Species Pool Functional Diversity Plays a Hidden Role in Generating  $\beta$ -  
546 Diversity. - *Am. Nat.* 191: E159–E170.
- 547 Pey, B. et al. 2014. Current use of and future needs for soil invertebrate functional traits in community  
548 ecology. - *Basic Appl. Ecol.* 15: 194–206.
- 549 Ricotta, C. and Moretti, M. 2011. CWM and Rao’s quadratic diversity: a unified framework for functional  
550 ecology. - *Oecologia* 167: 181–188.
- 551 Shipley, B. 2010. *From plant traits to vegetation structure: chance and selection in the assembly of*  
552 *ecological communities*. - Cambridge University Press.
- 553 Siefert, A. et al. 2015. A global meta-analysis of the relative extent of intraspecific trait variation in plant  
554 communities. - *Ecol. Lett.* 18: 1406–1419.
- 555 Spasojevic, M. J. et al. 2018. Integrating species traits into species pools. - *Ecology* 99: 1265–1276.
- 556 Umaña, M. N. et al. 2015. Commonness, rarity, and intraspecific variation in traits and performance in  
557 tropical tree seedlings (K Suding, Ed.). - *Ecol. Lett.* 18: 1329–1337.
- 558 Violle, C. et al. 2007. Let the concept of trait be functional! - *Oikos* 116: 882–892.

- 559 Violle, C. et al. 2012. The return of the variance: intraspecific variability in community ecology. - Trends  
560 Ecol. Evol. 27: 244–252.
- 561 Violle, C. et al. 2014. The emergence and promise of functional biogeography. - Proc. Natl. Acad. Sci. 111:  
562 13690–13696.
- 563 Violle, C. et al. 2015. Vegetation ecology meets ecosystem science: Permanent grasslands as a functional  
564 biogeography case study. - Sci. Total Environ. 534: 43–51.
- 565 Violle, C. et al. 2017. Functional Rarity: The Ecology of Outliers. - Trends Ecol. Evol. 32:356-367.
- 566 Webb, C. T. et al. 2010. A structured and dynamic framework to advance traits-based theory and  
567 prediction in ecology. - Ecol. Lett. 13: 267–283.
- 568 Weiher, E. et al. 1998. Community assembly rules, morphological dispersion, and the coexistence of  
569 plant species. - Oikos: 309–322.
- 570 Weiher, E. et al. 2011. Advances, challenges and a developing synthesis of ecological community  
571 assembly theory. - Philos. Trans. R. Soc. B Biol. Sci. 366: 2403–2413.
- 572 Zobel, M. 1997. The relative of species pools in determining plant species richness: an alternative  
573 explanation of species coexistence? - Trends Ecol. Evol. 12: 266–269.
- 574

## 575 **Figures**

576 **Figure 1.** Departure of CWM and CWV from the parameters of environmental filtering,  $t_{opt}$  and  
577  $\sigma_{opt}^2$ , respectively, due to trait limits in the species pool.

578 The trait distribution in communities (histograms) reflects the joint influence of trait range limits among  
579 immigrants from the species pool (top horizontal black line), and of a Gaussian environmental filter  
580 determining immigrant establishment success with mean  $t_{opt}$  (dashed blue lines) and standard deviation  
581  $\sigma_{opt}^2$  (blue horizontal arrows) in specific environments (grey rectangles). The dashed red lines  
582 represent the observed Community Weighted Mean (CWM) values in each community. CWM deviates  
583 from  $t_{opt}$  when closer to the limits of the trait range in the species pool because of the bounded species  
584 pool's trait range. The range of observed CWM values (red segment) is then smaller than the one of  $t_{opt}$   
585 values as shown in the CWM ~ Environment plot. Similarly, while  $\sigma_{opt}^2$ , which represents the  
586 environmental filtering intensity, remains constant over the environment gradient, CWV, depicted by the  
587 horizontal red arrows, decreases when approaching environment selecting for trait values closed to the  
588 species pool boundaries. The hump-shaped relationship between realized CWV and the environment thus  
589 represents the influence of the trait range limits and not a more intense filtering at the extremes of the  
590 gradient.

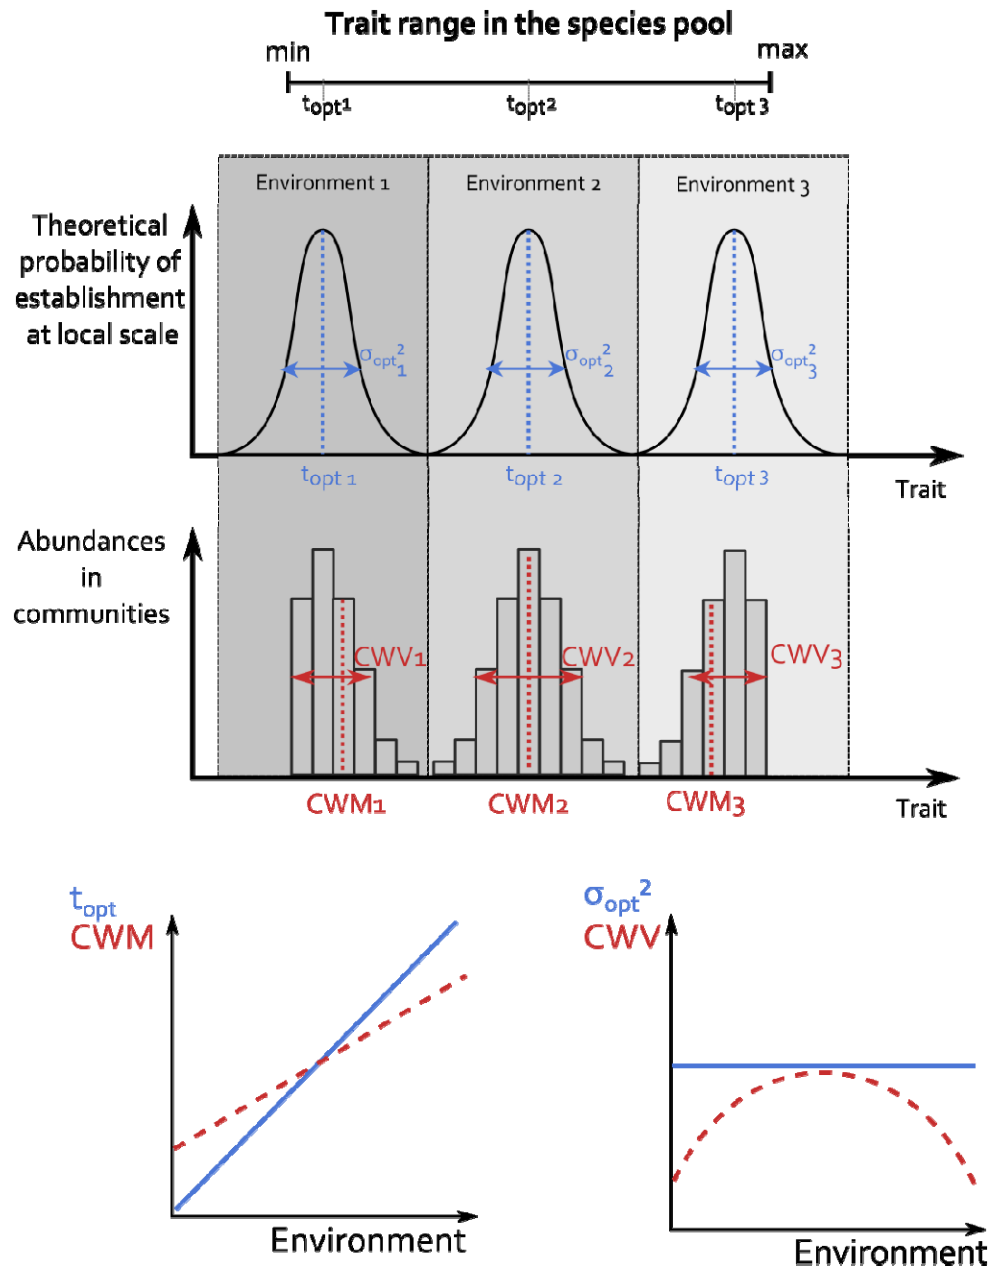

591

1 **Figure 2.** Variation in CWM and CWV values (left, red color), and of estimated  $\hat{t}_{opt}$  and  $\hat{\sigma}_{opt}^2$   
2 (right, blue color), for simulated communities along  $t_{opt}$  gradient.  
3 Communities were simulated with constant environmental filtering ( $\sigma_{opt} = 0.25$ ), uniform distribution of  
4 trait values and uniform abundances in the species pool. Top figures (a) and (b) represent CWM and  $\hat{t}_{opt}$ ,  
5 and figures (c) and (d) represent CWV and  $\hat{\sigma}_{opt}^2$ . The  $\hat{t}_{opt}$  and  $\hat{\sigma}_{opt}^2$  values were obtained with the  
6 ABC approach and correctly estimated the  $t_{opt}$  and  $\sigma_{opt}^2$  values (b and d). Conversely, CWM departed from  
7  $t_{opt}$  and CWV was below  $\sigma_{opt}^2$  when the influence of trait range limits increased at the extremes. The black  
8 solid line represents equality of CWM and CWV to the parameters of environmental filtering ( $t_{opt}$  and  
9  $\sigma_{opt}^2$ , respectively). Slope coefficients and the associated confidence intervals of the linear regression  
10 equations between CWM and  $t_{opt}$  are displayed in panel (a) and (b). The mean of the difference between  
11  $\sigma_{opt}^2$  and CWV (c) is twice higher than for the difference between  $\sigma_{opt}^2$  and  $\hat{\sigma}_{opt}^2$  (d) (respectively 2.23e-2  
12 and 8.91e-3).

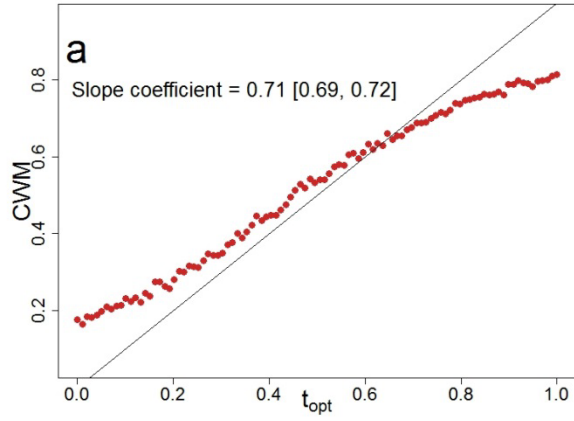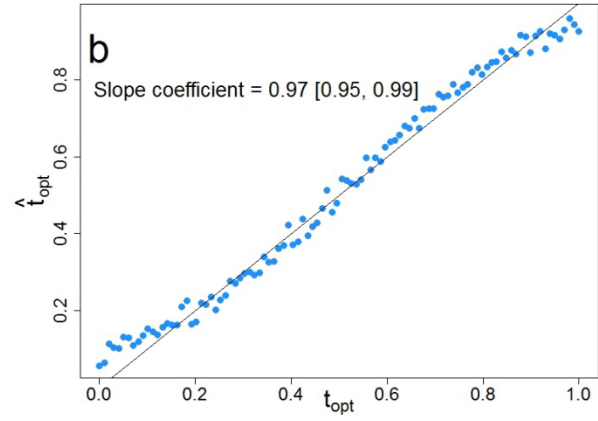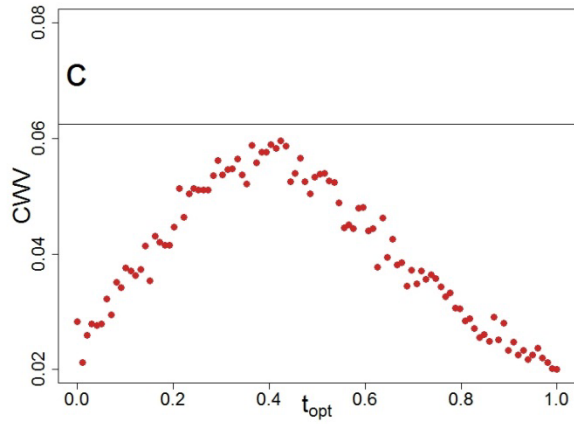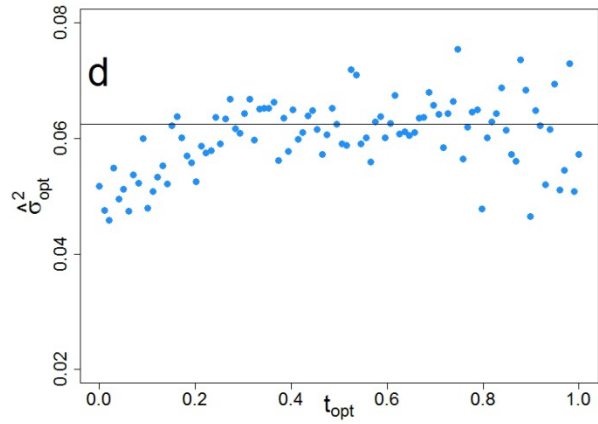

1

2

1 **Figure 3.** Variation in CWM and CWV (left, red color), and in estimated  $\hat{t}_{opt}$  and  $\hat{\sigma}_{opt}^2$  (right,  
2 blue color) along the  $t_{opt}$  gradient, with increasing intensity of environmental filtering at the  
3 extremes of the gradient.

4 Top figures (a) and (b) represent CWM and  $\hat{t}_{opt}$ , and figures (c) and (d) represent CWV and  $\hat{\sigma}_{opt}^2$ . The  
5 estimation of parameters  $\hat{t}_{opt}$  and  $\hat{\sigma}_{opt}^2$ , obtained with the ABC approach, acknowledges the effect of  
6 trait range limits, and departs from CWM and CWV, respectively when the influence of the trait range  
7 limits increases at the extremes. The black solid line represents equality of CWM and CWV to the  
8 parameters of environmental filtering ( $t_{opt}$  and  $\sigma_{opt}$ , respectively). Slope coefficients and the associated  
9 confidence intervals of the linear regression equations between CWM and  $t_{opt}$  are displayed in panel (a)  
10 and (b). The mean of the difference between  $\sigma_{opt}^2$  and CWV (c) and between  $\sigma_{opt}^2$  and  $\hat{\sigma}_{opt}^2$  (d) is  
11 comparable but lower for the latter case (respectively 4.08 e-2 and 3.37e-2).

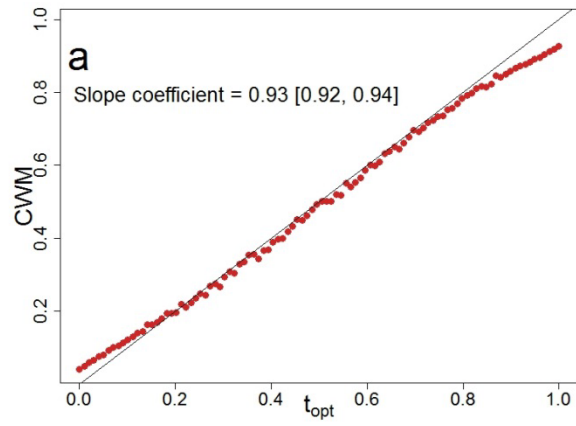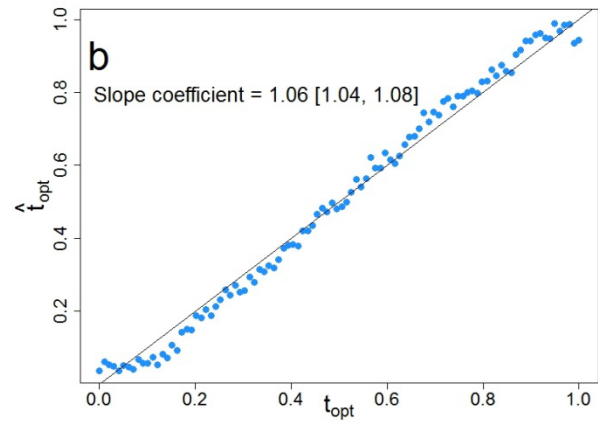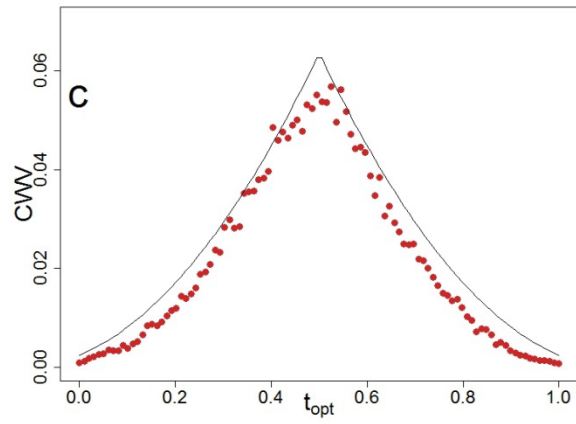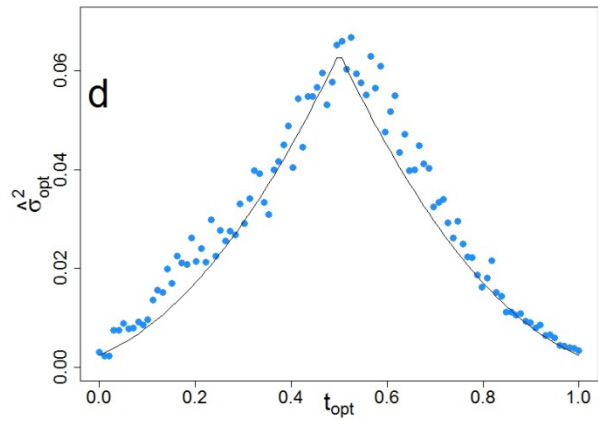

1  
2  
3



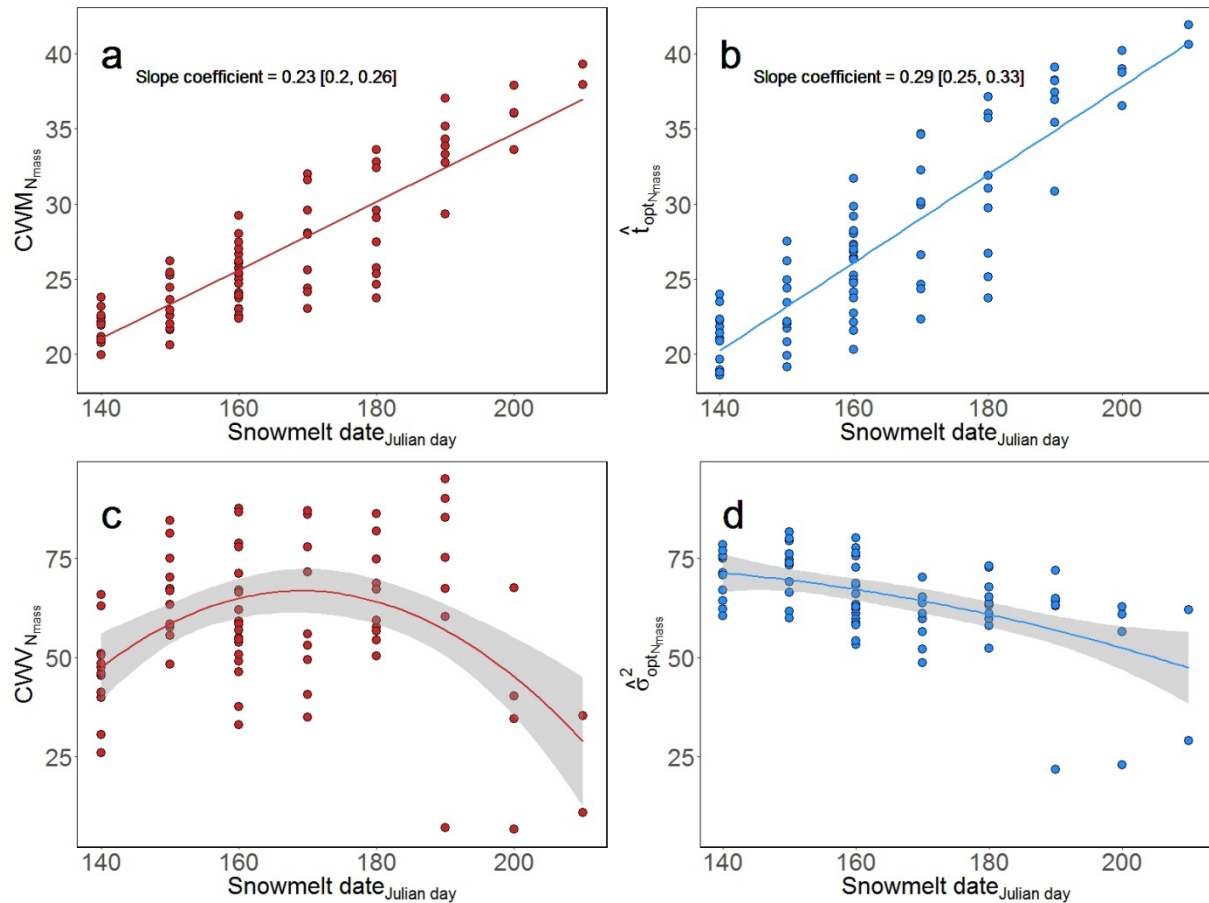

1

2 **Figure 4.** Relationships of CWV (red color) and estimated  $\sigma_{opt}^2$  (blue color) for the leaf nitrogen  
3 content on a mass basis ( $N_{mass}$ , panel a) and the specific leaf area (SLA, panel b),  
4 according to the gradient of snow cover melting date (in Julian days, abscissa).

5 Linear regressions were fitted for each variable against the snowmelt date in panels a and c. While both

6 highly significant, the slope term was higher for with the estimated  $\hat{t}_{opt}$  (slope = 0.29) than with the

7 CWV (slope = 0.23). For the panels c and d, a quadratic regression between CWV and snowmelt date was

8 significant while the quadratic term became non-significant with  $\hat{\sigma}_{opt}^2$ .  $N_{mass}$  is measured in mg[N]/mg.

9

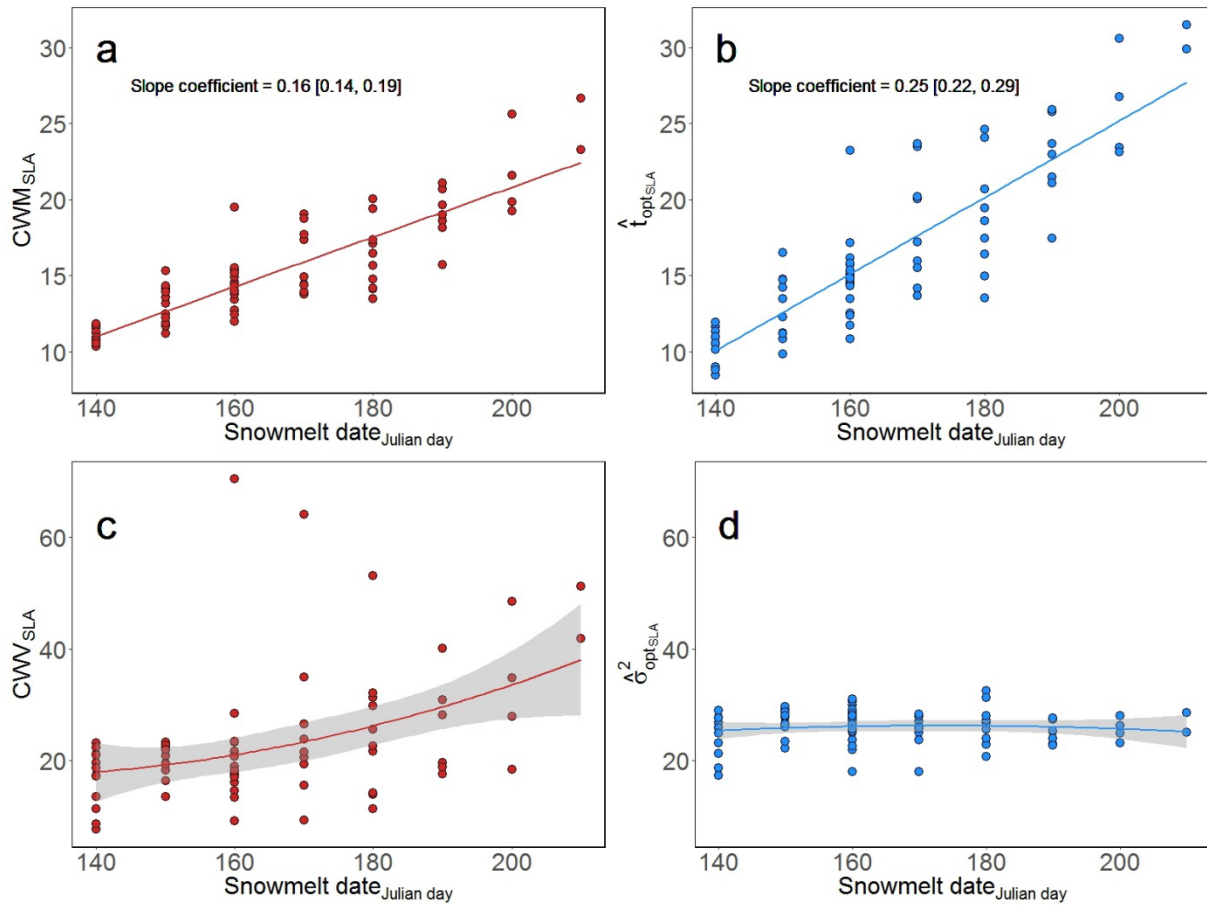

1

2 **Figure 5.** Relationships of CWV (red color) and estimated  $\sigma_{opt}^2$  (blue color) for the specific leaf  
3 area (SLA), according to the gradient of snow cover melting date (in Julian days,  
4 abscissa).

5 Linear regressions were fitted for each variable against the snowmelt date in panels a and c. While both  
6 highly significant, the slope term was higher for with the estimated  $\hat{t}_{opt}$  (slope = 0.25) than with the  
7 CWV (slope = 0.16). For both panels c and d, both quadratic regressions between CWV and  $\hat{\sigma}_{opt}^2$  with  
8 snowmelt date were non-significant. SLA is measured in m<sup>2</sup>/kg.

9

## 1 Supporting information

### 2 Appendix S1. Moments of the located trait distribution.

3 With a uniform distribution of species trait values in the species pool ranging between  $a$  and  
 4  $b$ , and a local Gaussian environmental filter with parameters  $t_{opt}$  and  $\sigma_{opt}$ , the local trait  
 5 distribution should follow a truncated Gaussian distribution, such as:

$$Eqn\ 1 \rightarrow CWM = t_{opt} + \frac{\varphi(\alpha) - \varphi(\beta)}{Z} \sigma_{opt}$$

$$Eqn\ 2 \rightarrow CWV = \sigma_{opt}^2 \left[ 1 + \frac{\alpha\varphi(\alpha) - \beta\varphi(\beta)}{Z} - \left( \frac{\varphi(\alpha) - \varphi(\beta)}{Z} \right)^2 \right]$$

$$Eqn\ 3 \rightarrow CWS = t_{opt}^3 + 3t_{opt}\sigma_{opt}^2 - \sigma \frac{(t_{opt}^2 + 2\sigma_{opt}^2 + bt_{opt} + b^2)\varphi(\beta) - (t_{opt}^2 + 2\sigma_{opt}^2 + at_{opt} + a^2)\varphi(\alpha)}{Z}$$

$$Eqn\ 4 \rightarrow CWK$$

$$= t_{opt}^4 + 6t_{opt}^2\sigma_{opt}^2 + 3\sigma^4$$

$$- \sigma \frac{(t_{opt}^3 + \sigma_{opt}^2(3b + 5t_{opt}) + bt_{opt}^2 + b^2t_{opt} + b^3)\varphi(\beta) - (t_{opt}^3 + \sigma_{opt}^2(3a + 5t_{opt}) + at_{opt}^2 + a^2t_{opt} + a^3)\varphi(\alpha)}{Z}$$

6

$$Eqn\ 5 \rightarrow m_k = (k-1)\sigma_{opt}^2 m_{k-2} + \mu m_{k-1} - \sigma_{opt} \frac{b^{k-1}\varphi\left(\frac{b-t_{opt}}{\sigma_{opt}}\right) - a^{k-1}\varphi\left(\frac{a-t_{opt}}{\sigma_{opt}}\right)}{\phi\left(\frac{b-t_{opt}}{\sigma_{opt}}\right) - \phi\left(\frac{a-t_{opt}}{\sigma_{opt}}\right)}, k = 1, 2, \dots$$

7 Where  $\alpha = \frac{a-t_{opt}}{\sigma_{opt}}$ ,  $\beta = \frac{b-t_{opt}}{\sigma_{opt}}$ ,  $Z = \phi(\beta) - \phi(\alpha)$ ,  $\varphi$  is the probability density function of the  
 8 standard normal distribution and  $\Phi$  is its cumulative density function (Barr & Sherrill, 1999),  $m_k$   
 9 is the  $k^{\text{th}}$  moment of the truncated normal distribution (based on  $m_{-1} = 0$  and  $m_0 = 1$ ),  $a$  and  $b$  are  
 10 the trait range limits (with  $a < b$ ),  $t_{opt}$  the mean and  $\sigma_{opt}$  the standard deviation of the Gaussian

1 filtering function,  $\alpha = \frac{a-t_{opt}}{\sigma_{opt}}$ ,  $\beta = \frac{b-t_{opt}}{\sigma_{opt}}$ ,  $Z = \phi(\beta) - \phi(\alpha)$ ,  $\phi$  is the probability density function

2 of the standard normal distribution and  $\Phi$  is its cumulative density function (Barr and Sherrill

3 1999).

4

## 5 **Reference**

6 Barr, D. R. and Sherrill, E. T. 1999. Mean and variance of truncated normal distributions. - Am. Stat. 53:  
7 357–361.

8

1 **Appendix S2.** R code to simulate and analyze communities.

2 This example is divided into two parts. The first part simulates communities using the R package  
3 *ecolottery* (Munoz et al. 2018), <https://cran.r-project.org/web/packages/ecolottery/index.html>). In  
4 the example of the paper, the parameters used to build communities are the following: species  
5 pool with 100.000 individuals belonging to 100 species with equal abundances (i.e., 1000  
6 individuals each), and species trait values drawn from a uniform distribution between  $a=0$  and  
7  $b=1$ . Each community includes 500 individuals and the immigrants establishing in communities  
8 are drawn from the species pool. Stabilizing environmental filtering determines establishment  
9 probability of immigrants depending on the departure of their trait value  $t$  from a local optimum  
10  $t_{opt}$ . We thus choose a Gaussian filtering function of mean  $t_{opt}$ , which varies among communities,  
11 and standard deviation  $\sigma_{opt}$  equal to 0.25. The data frame of simulated communities is called *sim*.  
12 The community-weighted mean (CWM) and variance (CWV) are calculated for each community,  
13 as well as functional dispersion (Laliberté and Legendre 2010) and Rao's entropy (Botta-Dukát  
14 2005).

15 The second section estimates the two parameters  $t_{opt}$  and  $\sigma_{opt}$  in each community, by comparing  
16 observed summary statistics of the community to summary statistics simulated over a broad  
17 range of  $t_{opt}$  and  $\sigma_{opt}$  values, with approximate Bayesian computation (ABC) analysis  
18 (*coalesc\_abc* function, Munoz et al. 2018).

19 Finally, the third just presents the code to generate the plot equivalent to the Figure 2 of the  
20 manuscript.

```
21 rm(list = ls())
22 #-----
23 # PART I/ Generate simulations: uniform species abundances and trait values in
24 # regional pool, trait values bounded between 0 and 1
25 #-----
26 # Installing package from CRAN and loading
27 install.packages("ecolottery")
28 library(ecolottery)
29 J <- 500
30 m <- 1
31 sim <- c()
32 # Trait range
33 a <- 0
34 b <- 1
35 # Generate a regional pool/metacommunity with equal species abundances and
36 # uniform trait distribution
37 # 100000 individuals, 100 species, trait values bounded between 0 and 1
38 pool <- cbind(1:100000, rep(sample(1:100), 1000), rep(NA, 100000))
39 colnames(pool) <- c("ind", "sp", "tra")
40 t.sp <- runif(1000, min = a, max = b)
41 pool[, "tra"] <- t.sp[pool[, "sp"]]
42 # Intraspecific variability
43 pool[, "tra"] <- rnorm(pool[, "tra"], pool[, "tra"], 0.001)
```

```
44 pool[, "tra"] <- ifelse(pool[, "tra"] > 1, 0.99, pool[, "tra"])
45 pool[, "tra"] <- ifelse(pool[, "tra"] < 0, 0.01, pool[, "tra"])
46 # Generate communities with habitat filtering, in 100 communities with
47 # distinct topt
48 # sigmaopt is fixed at 0.25
49 topt <- seq(from = a, to = b, by = (b-a) / 99)
50 sigmaopt <- 0.25
51 for(j in 1:length(topt)) {
52   comm <- coalesc(J, m, pool=pool, traits=NULL,
53                 filt = function(x) exp(-(x-topt[j])^2/(2*sigmaopt^2)))
54   sim <- rbind(sim, cbind(rep(j, nrow(comm$com)),
55                           rep(topt[j], nrow(comm$com)), comm$com))
56 }
57 # Column names of the metacommunity dataset
58 colnames(sim) <- c("com", "topt", "ind", "sp", "tra")
59 # Conversion to data.frame
60 sim <- as.data.frame(sim)
61 # Table of species abundances per community
62 temp <- as.data.frame(table(sim$sp, sim$com))
63 colnames(temp) <- c("sp", "com", "ab")
64 # Relative abundances
65 temp$abrel <- temp$ab / J
66 # Merging abundances with simulation
```

```
67 library(dplyr)
68 sim$sp_com <- paste(sim$sp, sim$com, sep="_")
69 temp$sp_com <- paste(temp$sp, temp$com, sep="_")
70 sim <- inner_join(sim, temp[, c("sp_com", "ab", "abrel")],
71                 by="sp_com")
72 # Computing CWM => not weighted by abundances because of intraspecific variability
73 cwm <- tapply(sim$tra, sim$com, mean)
74 cwm <- data.frame("com" = names(cwm), "cwm" = as.numeric(cwm))
75 sim$com <- as.character(sim$com)
76 sim <- inner_join(sim, cwm, by = "com")
77
78 # Computing CWV => not weighted by abundances because of intraspecific variability
79 cwv <- tapply(sim$tra, sim$com, var)
80 cwv <- data.frame("com" = names(cwv), "cwv" = as.numeric(cwv))
81 sim <- inner_join(sim, cwv, by = "com")
82
83 # Computing Fdis and Rao
84 library(FD)
85 FD_com <- c()
86 for(i in 1:length(unique(sim$com))){
87   com <- sim[which(sim$com == unique(sim$com)[i]), c("ind", "tra", "abrel")]
88   com <- com[!duplicated(com), ]
89   tra_ind <- com[, c("ind", "tra")]
```



```
90   rownames(tra_ind) <- tra_ind$ind
91   tra_ind <- tra_ind[, "tra", drop = FALSE]
92   ab_ind <- rep(1, nrow(com))
93   names(ab_ind) <- com$ind
94   tmp <- dbFD(tra_ind, a = ab_ind, w.abun = FALSE)
95   FD_com <- rbind(FD_com, c(unique(sim$com)[i], as.numeric(tmp$FDis),
96 as.numeric(tmp$RaoQ)))
97 }
98 FD_com <- data.frame(FD_com)
99 colnames(FD_com) <- c("com", "fdis", "rao")
100 sim <- inner_join(sim, FD_com, by = "com")
101 sim$fdis <- as.numeric(as.character(sim$fdis))
102 sim$rao <- as.numeric(as.character(sim$rao))
103 # Plot showing correlations between CWV and functional diversity metrics
104 library(GGally)
105 ggpairs(sim[!duplicated(sim$com), c("cwv", "fdis", "rao")]) +
106   theme_classic()
107 #-----
108 # PART II/ ABC-based parameter estimation
109 #-----
110 require(vegan)
111 # Function to compute 6 summary statistics: the four first orders of community
112 # weighted moments (mean, variance, skewness and kurtosis) and two taxonomic
```

```
113 # statistics (specific richness and Shannon diversity index)
114 f.sumstats <- function(com){
115     array(dimnames = list(c("cwm", "cwv", "cws", "cwk", "S", "Es")),
116           c(mean(com[, 3]), var(com[, 3]), e1071::skewness(com[, 3]),
117             e1071::kurtosis(com[, 3]), vegan::specnumber(table(com[, 2])),
118             vegan::diversity(table(com[, 2]))))
119 }
120
121 # Observed summary statistics
122 ss.obs <- c()
123 for(i in 1:length(unique(sim$com))) {
124     comm <- sim[which(sim$com == unique(sim$com)[i]), c("ind", "sp", "tra")]
125     ss.obs[[i]] <- f.sumstats(comm)
126 }
127 comm.sd <- unlist(lapply(ss.obs, function(x) sqrt(x["cwv"])))
128 comm.cwm <- unlist(lapply(ss.obs, function(x) x["cwm"]))
129 # Possibility to reconstruct the pool of species from communities composition
130 # true_pool <- pool
131 # pool <- sim[, c("ind", "sp", "tra")]
132
133 # Filtering function
134 filt_gaussian <- function(t, params) exp(-(t-params[1])^2/(2*params[2]^2))
135 # Parameters values
```

```
136  params <- data.frame(rbind(c(min(pool[, "tra"]), max(pool[, "tra"])),
137                          c(min(comm.sd), sd(pool[, "tra"]))))
138  row.names(params) <- c("topt", "sigmaopt")
139  # Number of values to sample in prior distributions
140  nb.samp <- 10^6
141  # ABC estimation of the parameters based on summary statistics of the observed
142  # community
143  # The function makes vary the migration rate, m, and the parameters of
144  # environmental filtering defined in params
145  res <- c()
146  for(i in 1:length(unique(sim$com))) {
147    comm <- sim[which(sim$com == unique(sim$com)[i]), c("ind", "sp", "tra")]
148    res[[i]] <- coalesc_abc(comm, pool, f.sumstats = f.sumstats,
149                          filt.abc = filt_gaussian,
150                          params=params, nb.samp = 1000, parallel = TRUE,
151                          tol = 1, pkg = c("e1071", "vegan"),
152                          method = "neuralnet")
153  }
154  # Mean estimated values of the parameters
155  topt.abc <- unlist(lapply(res, function(x) weighted.mean(x$abc$adj.value[, "topt"], w =
156  x$abc$weights)))
157  sigmaopt.abc <- unlist(lapply(res, function(x) weighted.mean(x$abc$adj.value[,
158  "sigmaopt"], w = x$abc$weights)))
```

```
159 m.abc <- unlist(lapply(res, function(x) weighted.mean(x$abc$adj.value[, "m"], w =
160 x$abc$weights)))
161 # Adding topt and sigmaopt to original dataset
162 library(dplyr)
163 topt_sim <- data.frame("com" = unique(sim$com), "topt_abc" = topt.abc)
164 sim <- inner_join(sim, topt_sim, by = "com")
165 sigmaopt_sim <- data.frame("com" = unique(sim$com), "sigmaopt_abc" = sigmaopt.abc)
166 sim <- inner_join(sim, sigmaopt_sim, by = "com")
167 m_sim <- data.frame("com" = unique(sim$com), "m_abc" = m.abc)
168 sim <- inner_join(sim, m_sim, by = "com")
169
170 ##-----
171 # PART III/ Plots
172 ##-----
173
174 simplot <- sim[!duplicated(sim$com), ]
175 # Slope tests
176 mobs <- lm(cwm ~ topt, data = simplot)
177 mabc <- lm(topt_abc ~ topt, data = simplot)
178 # Quadratic regression for CWV
179 mvobs <- lm(cwv ~ topt + I(topt^2), data = simplot)
180 mvabc <- lm(sigmaopt_abc ~ topt + I(topt^2), data = simplot)
181 obs_slope <- paste0("Slope coefficient = ", round(summary(mobs)$coefficients[2, 1], 2),
182 " [", round(confint(mobs)[2, 1], 2), ", ", round(confint(mobs)[2, 2], 2), " ]")
```

```
183 abc_slope <- paste0("Slope coefficient = ",round(summary(mabc)$coefficients[2, 1], 2),
184 " [" , round(confint(mabc)[2, 1], 2), " , ",round(confint(mabc)[2, 2], 2), " ]")
185 # Four panels
186 par(mfrow = c(2, 2), mai = c(1, 0.9, 0.1, 0.3))
187 y_lim <- c(round((min(simpplot$cwm, simpplot$topt_abc)*2/2), 2),
188           round((max(simpplot$cwm, simpplot$topt_abc)*2/2), 2))
189 # CWM ~ topt
190 plot(simpplot$topt, simpplot$cwm, xlab = "", ylab = "", xaxt = "n", yaxt = "n",
191       xlim = c(0, 1), ylim = c(y_lim[1], y_lim[2]),
192       col = "firebrick3", pch = 16, cex = 1.5)
193 axis(1, cex.axis = 1.4)
194 mtext(expression("t"["opt"]), side = 1, line = 2.2, cex = 2)
195 axis(2, cex.axis = 1.4)
196 mtext("CWM", side = 2, line = 2.2, cex = 2)
197 abline(0, 1, lwd = 1)
198 legend(x = -0.1, y = 11/10 * y_lim[2],
199       bty = "n", legend = "a", cex = 2, col = "black")
200 legend(-0.2, 10/10 * y_lim[2], obs_slope, bty = "n", cex = 2)
201
202 # topt_ABC ~ topt
203 plot(simpplot$topt, simpplot$topt_abc, xlab = "", ylab = "", xaxt = "n",
204       yaxt = "n", xlim = c(0, 1), ylim = c(y_lim[1], y_lim[2]),
205       col = "dodgerblue", pch = 16, cex = 1.5)
```

```
206 axis(1, cex.axis = 1.4)
207 mtext(expression("t"["opt"]), side = 1, line = 2.2, cex = 2)
208 axis(2, cex.axis = 1.4)
209 mtext(expression(hat("t")["opt"]), side = 2, line = 2.2, cex = 2)
210 abline(0, 1, lwd = 1)
211 legend(x = -0.1, y = 11/10 * y_lim[2],
212        bty = "n", legend = "b", cex = 2, col = "black")
213 legend(-0.2, 10/10 * y_lim[2], abc_slope, bty = "n", cex = 2)
214
215 # CWV ~ topt
216 y_lim <- c(round((min(simplot$cwv, simplot$sigmaopt_abc^2) * 9/10), 2),
217           round((max(simplot$cwv, simplot$sigmaopt_abc^2) * 11/10), 2))
218
219 cwv_diff <- mean(abs(simplot$cwv - 0.25^2))
220 cwv_diff <- scales::scientific_format()(cwv_diff)
221 plot(simplot$topt, simplot$cwv, xlab = "", ylab = "", xaxt = "n", yaxt = "n",
222      xlim = c(0, 1), ylim = c(y_lim[1], y_lim[2]),
223      col = "firebrick3", pch = 16, cex = 1.5)
224 legend(x = -0.1, y = y_lim[2] * 11/10, bty = "n", legend = "c", cex = 2, col = "black")
225 axis(1, cex.axis = 1.4)
226 mtext(expression("t"["opt"]), side = 1, line = 2.2, cex = 2)
227 axis(2, cex.axis = 1.4)
228 mtext("CWV", side = 2, line = 2.2, cex = 2)
```

```
229  abline(0.25^2, 0, cex = 2)

230

231  # sigmaopt_ABC^2 ~ topt

232  sigmaopt_abc_diff <- mean(abs(simplot$sigmaopt_abc^2 - 0.25^2))

233  sigmaopt_abc_diff <- scales::scientific_format()(sigmaopt_abc_diff)

234  plot(simplot$topt, simplot$sigmaopt_abc^2, xlab = "", ylab = "", xaxt = "n",

235       yaxt = "n", xlim = c(0, 1), ylim = c(y_lim[1], y_lim[2]),

236       col = "dodgerblue", pch = 16, cex = 1.5)

237  legend(x = -0.1, y = y_lim[2] * 11/10,

238        bty = "n", legend = "d", cex = 2, col = "black")

239  axis(1, cex.axis = 1.4)

240  mtext(expression("t"["opt"]), side = 1, line = 2.2, cex = 2)

241  axis(2, cex.axis = 1.4)

242  mtext(expression(hat(sigma) ["opt"] ^"2"), side = 2, line = 2.2, cex = 2)

243  abline(0.25^2, 0, cex = 2)
```

244 **Appendix S3.** Variation of CWW values with CWM (top, red color), and of  $\hat{\sigma}_{opt}^2$  with  $t_{opt}$  and  
245 (bottom, blue color), for two sets of simulated communities with constant (left,  $\sigma_{opt} = 0.25$ ) or  
246 varying ( $\sigma_{opt}$  from 0.25 to 0.05, peaking at  $t_{opt} = 0.5$ ) intensity of environmental filtering.

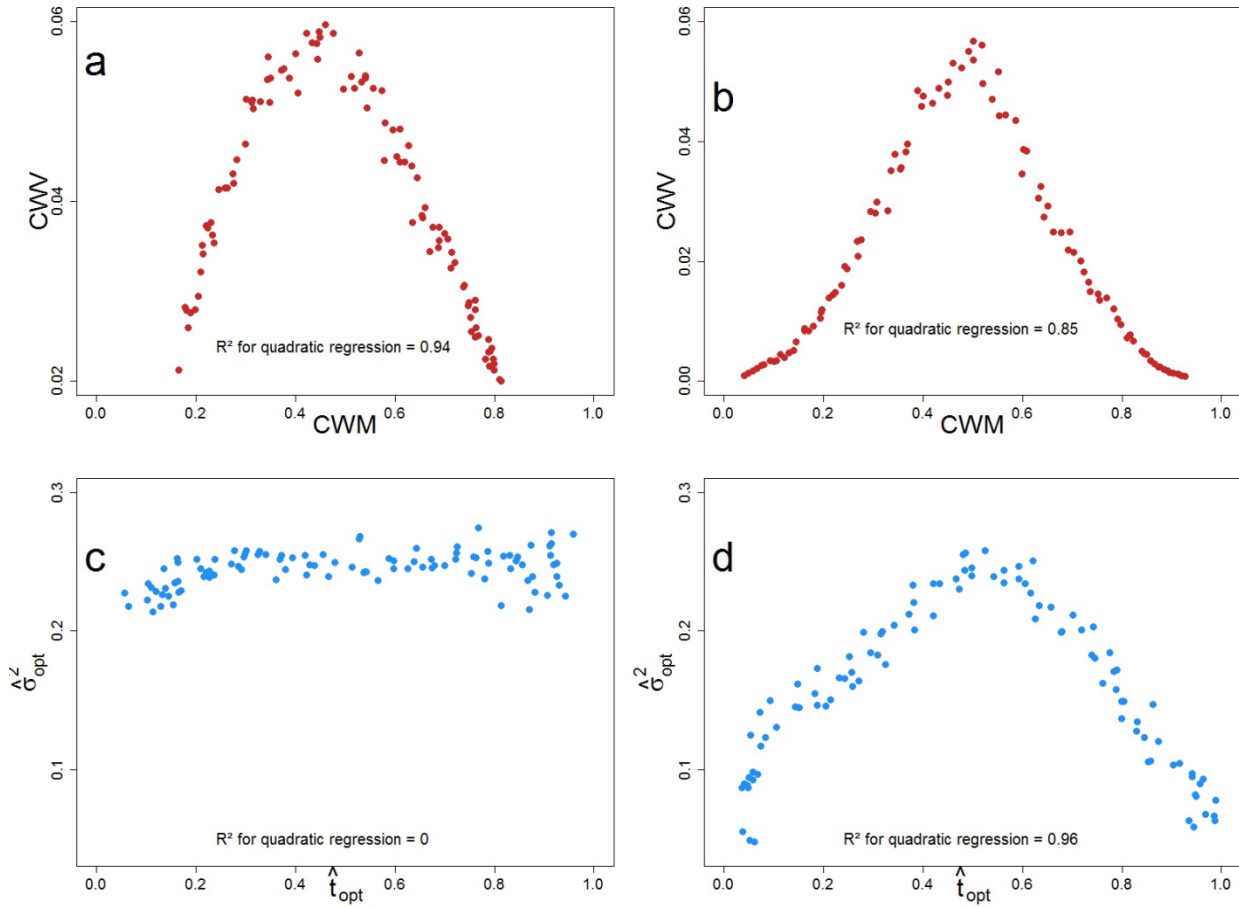

247



248 **Appendix S4.** Analysis of simulated communities with constant and strong environmental filtering ( $\sigma_{opt} =$   
249 0.05), low intraspecific variability ( $\sigma = 0.001$  for each species trait value) and uniform distribution of  
250 species pool abundances.

251 The left red curves show the variation of CWM (top) and CWV (bottom) according to  $t_{opt}$ . The right blue  
252 curves show the estimated  $\hat{t}_{opt}$  (top) and  $\hat{\sigma}_{opt}^2$  (bottom) values according to  $t_{opt}$ . The black solid line  
253 represents equality of CWM and CWV to the parameters of environmental filtering ( $t_{opt}$  and  $\sigma_{opt}$ ,  
254 respectively). Slope coefficients and the associated confidence intervals of the linear regression equations  
255 between  $CWM / \hat{t}_{opt}$  and  $t_{opt}$  are displayed in panel (a) and (b). The mean of the difference between  $\sigma_{opt}^2$   
256 and CWV (c) is comparable to the difference between  $\sigma_{opt}^2$  and  $\hat{\sigma}_{opt}^2$  (d) (respectively 6.02e-2 and 6e-2).

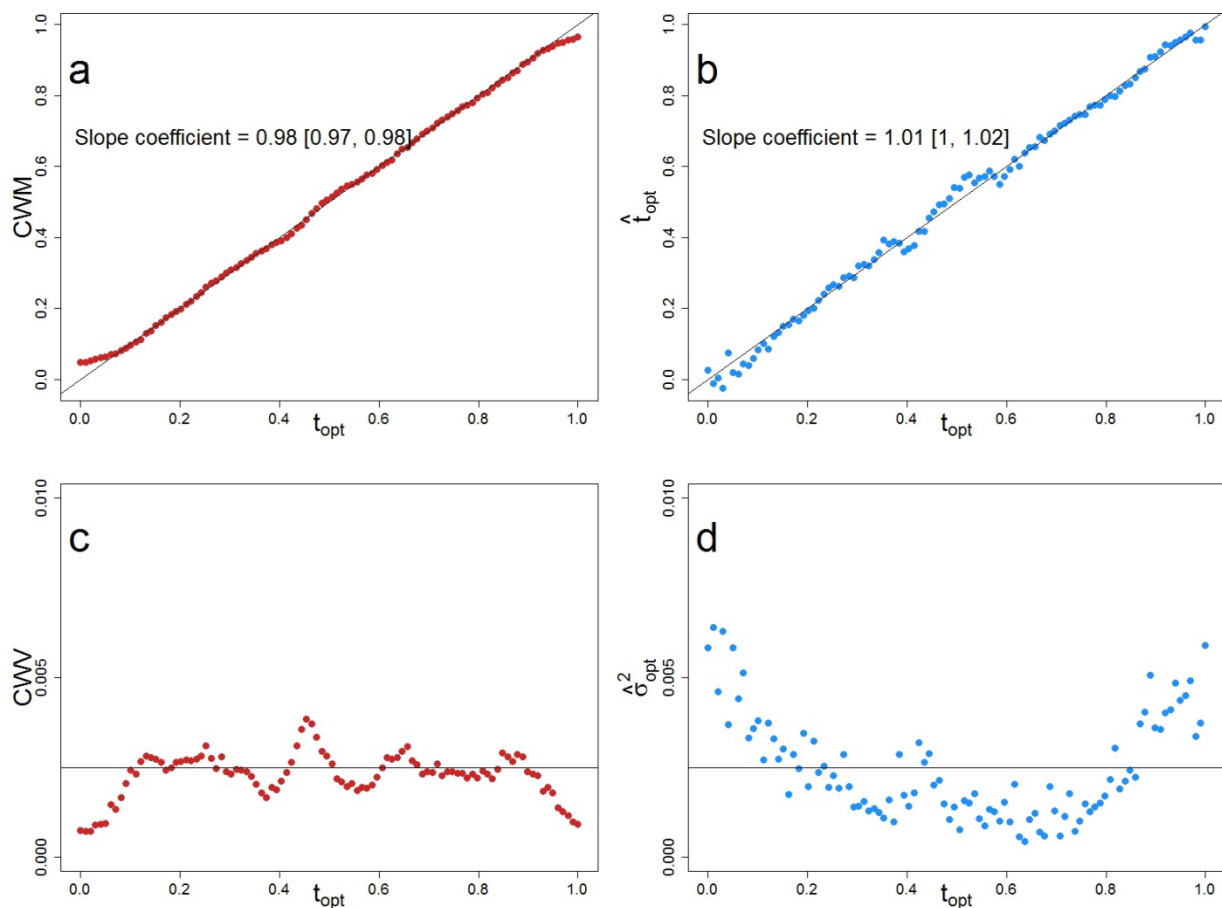

257

258

259 **Appendix S5.** Community-weighted skewness (CWS) and kurtosis (CWK) of simulated communities.

260 CWS is calculated for community  $j$  as

$$\text{Eqn. 5} \rightarrow CWS_j = \frac{\sum_{i=1}^S p_{ij}(t_{ij} - CWM_j)^3}{CWM_j^{3/2}}$$

261 and CWK is calculated for community  $j$  as

$$\text{Eqn. 6} \rightarrow CWK_j = \frac{\sum_{i=1}^S p_{ij}(t_{ij} - CWM_j)^4}{CWM_j^2} - 3$$

262 Where  $S$  is the number of species in community  $j$ ,  $p_{ij}$  is the relative abundance of species  $i$  in community  $j$ ,

263  $t_{ij}$  is the average trait value of species  $i$  in community  $j$ .

264 Panel (a) displays the variation of CWS and panel (b) of CWK in simulated communities according to  $t_{opt}$ ,

265 with uniform species pool abundances and constant environmental filtering ( $\sigma_{opt} = 0.25$ ; same dataset as in

266 Fig. 2).

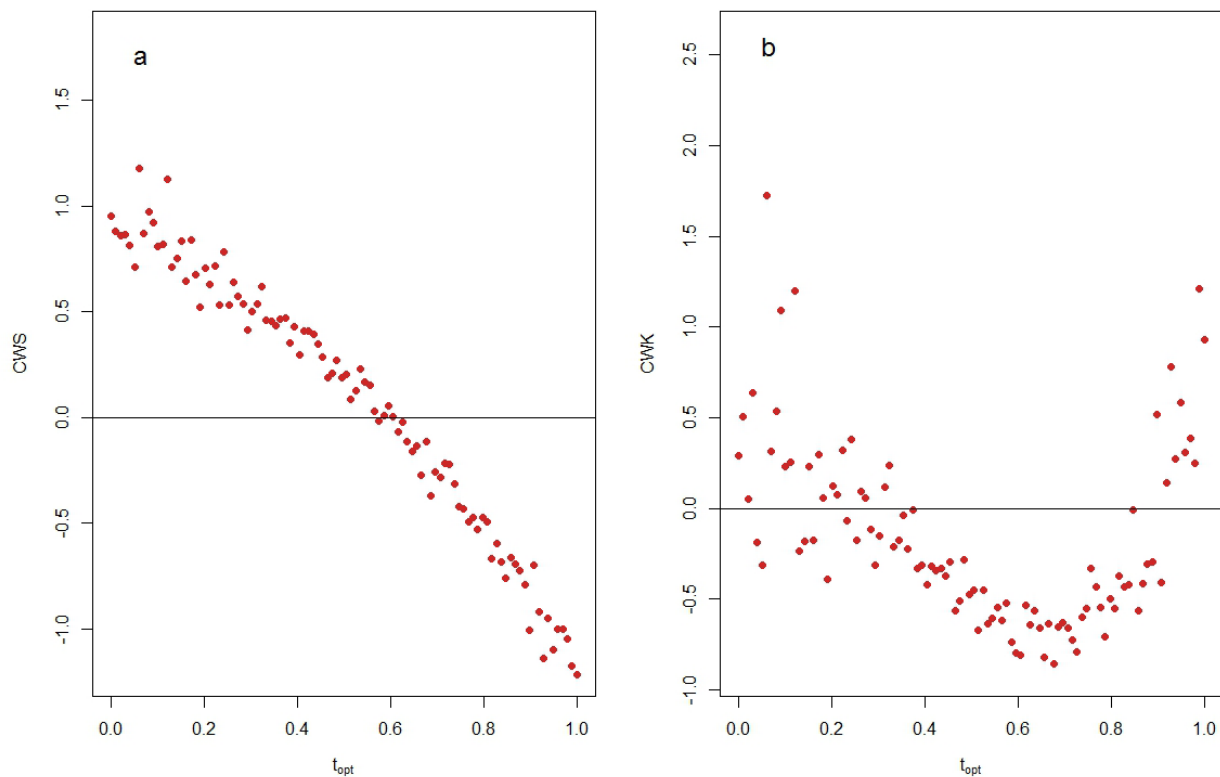

267

268 **Appendix S6.** Variation of CWM and CWV according to  $t_{opt}$ , with constant environmental filtering  
269 intensity ( $\sigma_{opt} = 0.25$ ), large intraspecific variability ( $\sigma = 0.1$  for each species trait value) and a uniform  
270 distribution of species pool abundances.

271 The left part (red curves) shows the variation of CWM (top) and CWV (bottom) according to  $t_{opt}$ . The  
272 right part (blue curves) shows the estimated  $\hat{t}_{opt}$  (top) and  $\hat{\sigma}_{opt}^2$  (bottom) values. The black solid line  
273 represents equality of CWM and CWV to the parameters of environmental filtering ( $t_{opt}$  and  $\sigma_{opt}$ ,  
274 respectively). Slope coefficients and the associated confidence intervals of the linear regression equations  
275 between  $CWM / \hat{t}_{opt}$  and  $t_{opt}$  are displayed in panel (a) and (b). The mean of the difference between  $\sigma_{opt}^2$   
276 and CWV (c) is twice higher than the difference between  $\sigma_{opt}^2$  and  $\hat{\sigma}_{opt}^2$  (d) (respectively  $2.3e-2$  and  
277  $4.78e-3$ ).

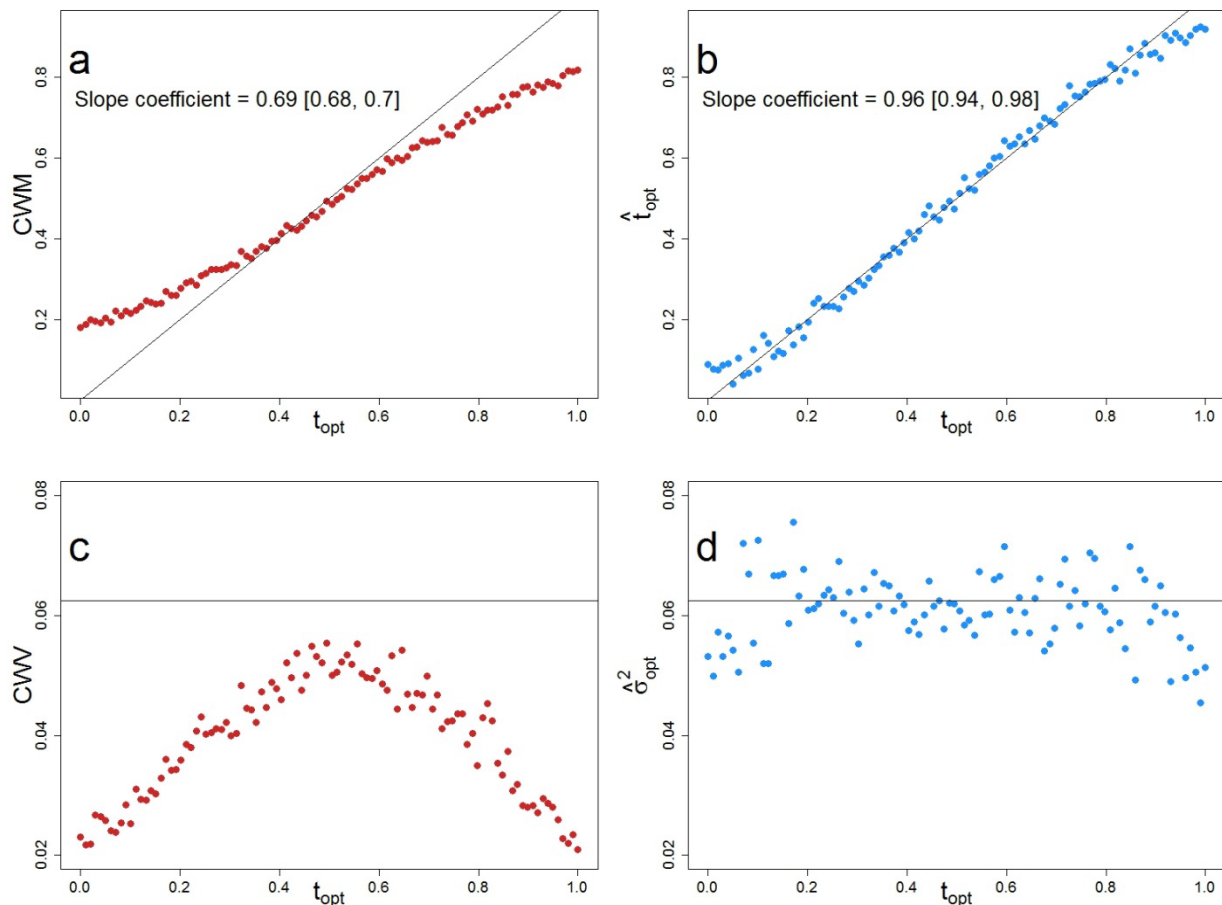

278

279

280 **Appendix S7.** Variation of CWM and CWV according to  $t_{opt}$ , with constant environmental filtering  
281 intensity ( $\sigma_{opt} = 0.25$ ) and a log-series (biodiversity parameter  $\theta = 50$ ) distribution of species pool  
282 abundances.

283 The left red curves show the variation of CWM (top) and CWV (bottom) according to  $t_{opt}$ . The right blue  
284 curves show the estimated  $\hat{t}_{opt}$  (top) and  $\hat{\sigma}_{opt}^2$  (bottom) values. The black solid line represents equality  
285 of CWM and CWV to the parameters of environmental filtering ( $t_{opt}$  and  $\sigma_{opt}^2$ , respectively). Slope  
286 coefficients and the associated confidence intervals of the linear regression equations between CWM /  
287  $\hat{t}_{opt}$  and  $t_{opt}$  are displayed in panel (a) and (b). The mean of the difference between  $\sigma_{opt}^2$  and CWV (c) is  
288 twice higher than the difference between  $\sigma_{opt}^2$  and  $\hat{\sigma}_{opt}^2$  (d) (respectively  $2.18e-2$  and  $4.79e-3$ ).

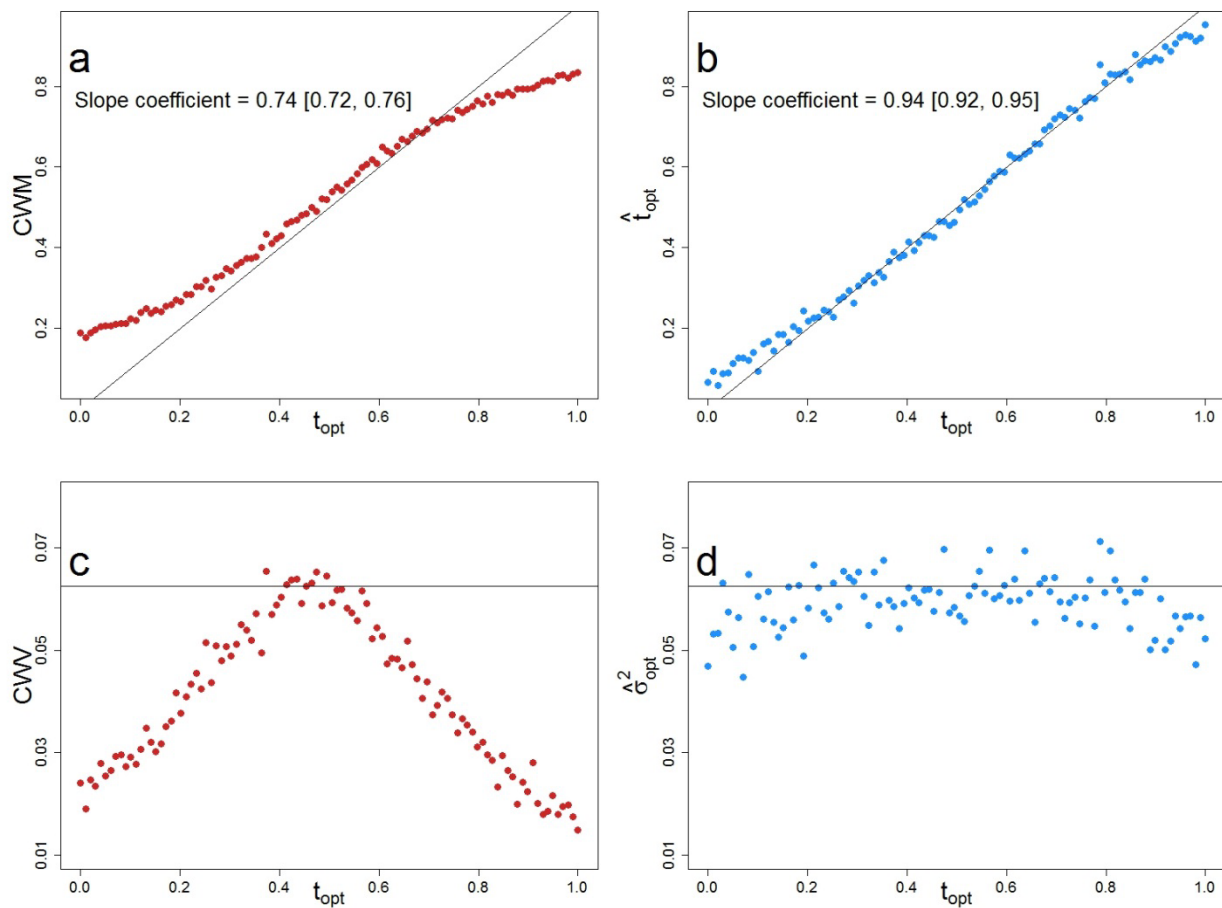

289

290

291 **Appendix S8.** Influence of environmental filtering intensity and trait range extent on the  
292 departure of CWM from  $t_{opt}$ .  
293 The global deviation of CWM from  $t_{opt}$  over the trait range (average distance between CWM and 1:1 line),  
294 summarizes the influence of the trait range limits on CWM over the whole environmental gradient. Blue,  
295 resp. black, points represent simulations with a trait range on [0; 1], resp. [0; 2], and varying filtering  
296 intensity ( $\sigma_{opt}$ , on abscissa).

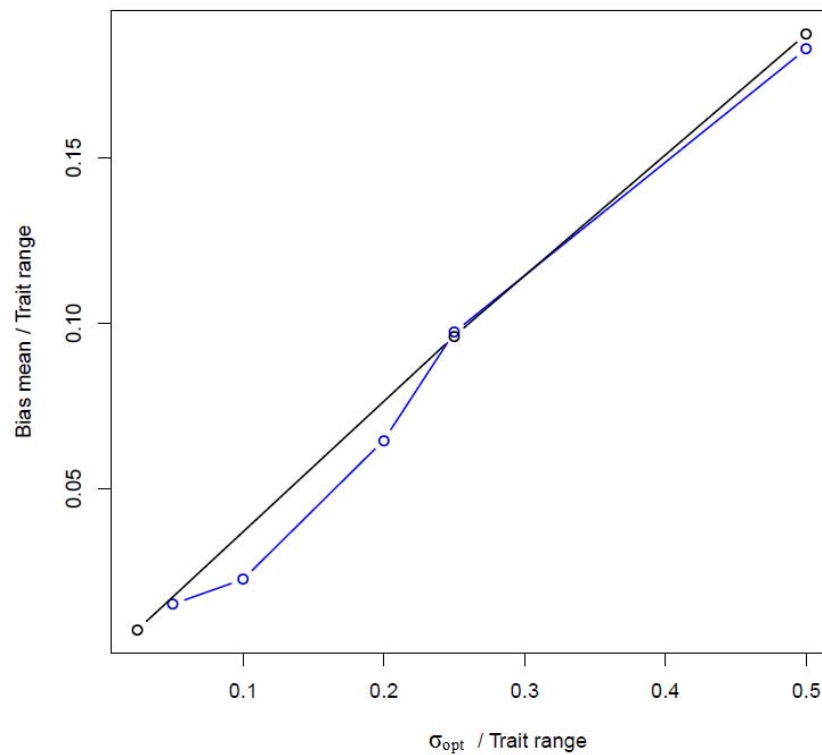

297

298

299 **Appendix S9.** Observed weighted skewness in communities (CWS) for the *aravo* dataset.

300 Panels a & b display the result for the alpine plant communities for  $N_{\text{mass}}$  (panel a) and SLA (panel b).

301

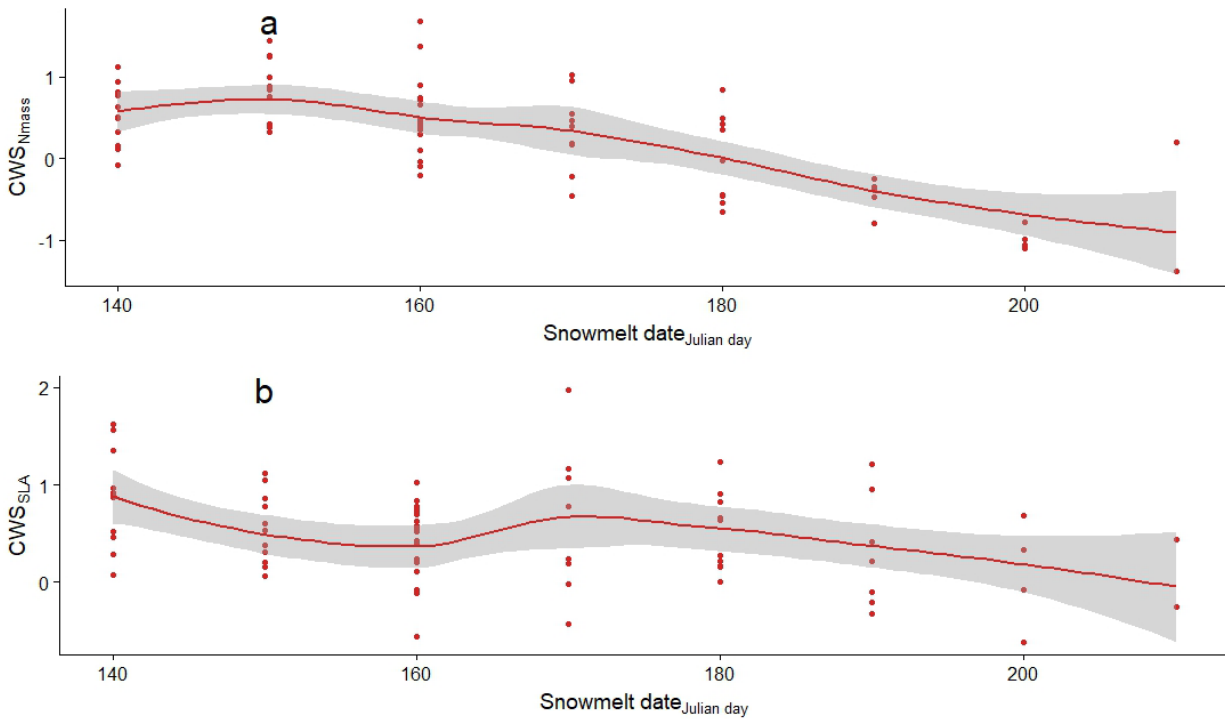

302

303

304 **Appendix S10.** Variation of functional dispersion, Rao's quadratic entropy and  $\hat{\sigma}_{opt}$  according to  $t_{opt}$ ,  
305 with constant environmental filtering intensity ( $\sigma_{opt} = 0.25$ ) and uniform distribution of species pool  
306 abundances.  
307 The first two red curves show the variation of functional dispersion (first panel) and Rao's quadratic  
308 entropy (second panel) according to  $t_{opt}$ . The third right blue curve shows the estimated  $\hat{\sigma}_{opt}$  values. The  
309 black solid line represents equality of CWV to the parameter of environmental filtering  $\sigma_{opt}$ . The fraction  
310 of variance explained by quadratic regression between the three metrics and  $\sigma_{opt}$  ( $R^2$ ) are displayed.

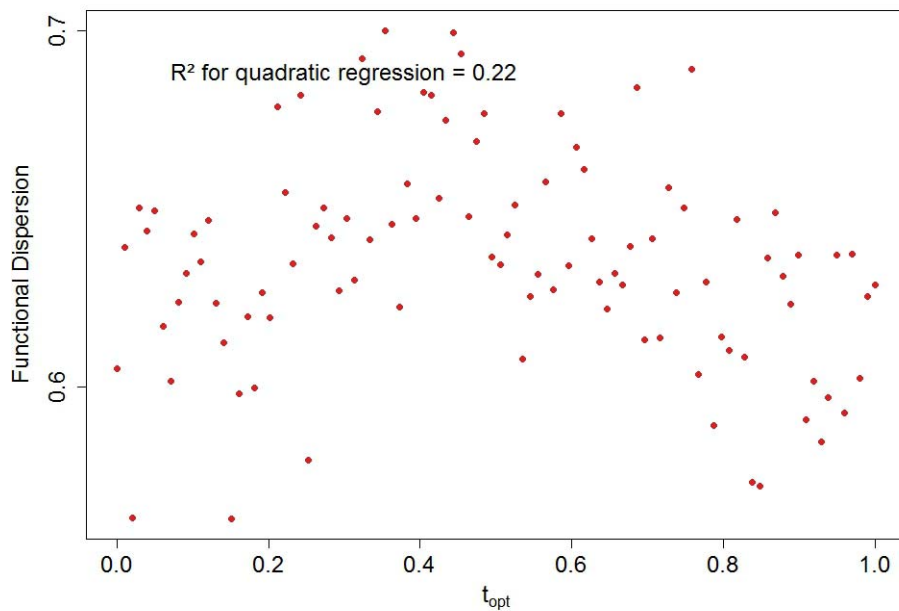

311

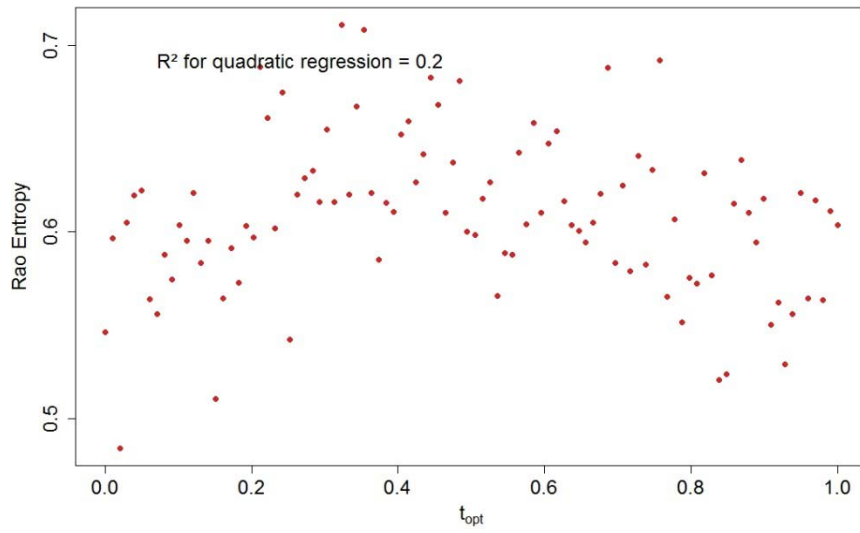

312

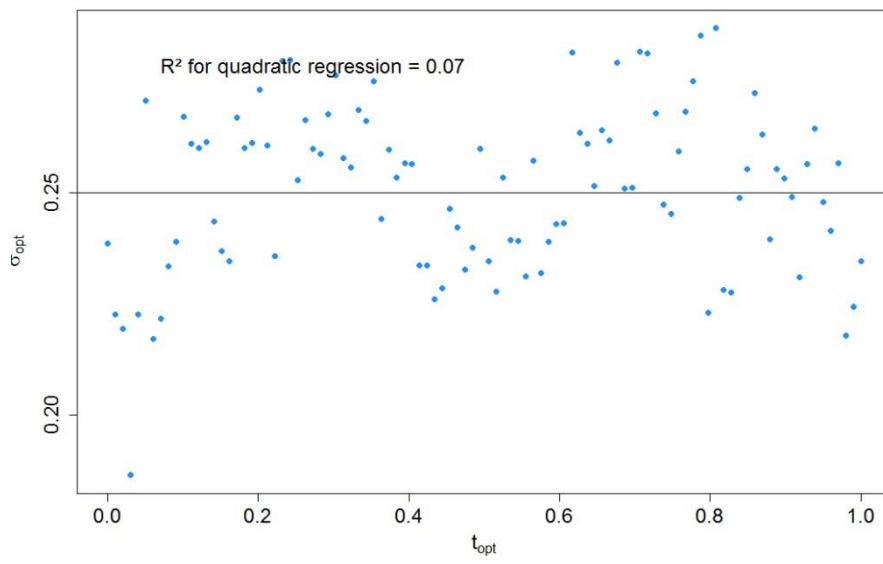

313

314



315 **Appendix S11.** Variation in CWM and CWV values (left, red color), and of estimated  $\hat{t}_{opt}$  and  
316  $\hat{\sigma}_{opt}^2$  (right, blue color), for simulated communities along  $t_{opt}$  gradient with the observed species  
317 pool.

318 Communities were simulated with constant environmental filtering ( $\sigma_{opt} = 0.25$ ), uniform distribution of  
319 trait values and uniform abundances in the species pool. Top figures (a) and (b) represent CWM and  $\hat{t}_{opt}$ ,  
320 and figures (c) and (d) represent CWV and  $\hat{\sigma}_{opt}^2$ . The  $\hat{t}_{opt}$  and  $\hat{\sigma}_{opt}^2$  values were obtained with the ABC  
321 approach and correctly estimated the  $t_{opt}$  and  $\sigma_{opt}^2$  values (b and d). The species pool used for ABC  
322 estimation of the parameters corresponds to the actual sum of observed communities. Conversely, CWM  
323 departed from  $t_{opt}$  and CWV was below  $\sigma_{opt}^2$  when the influence of the trait range limits increased at the  
324 extremes. The black solid line represents equality of CWM and CWV to the parameters of environmental  
325 filtering ( $t_{opt}$  and  $\sigma_{opt}^2$ , respectively). Slope coefficients and the associated confidence intervals of the  
326 linear regression equations between CWM /  $\hat{t}_{opt}$  and  $t_{opt}$  are displayed in panel (a) and (b). The mean of  
327 the difference between  $\sigma_{opt}^2$  and CWV (c) is twice higher than the difference between  $\sigma_{opt}^2$  and  $\hat{\sigma}_{opt}^2$  (d)  
328 (respectively 2.23e-2 and 8.91e-3).

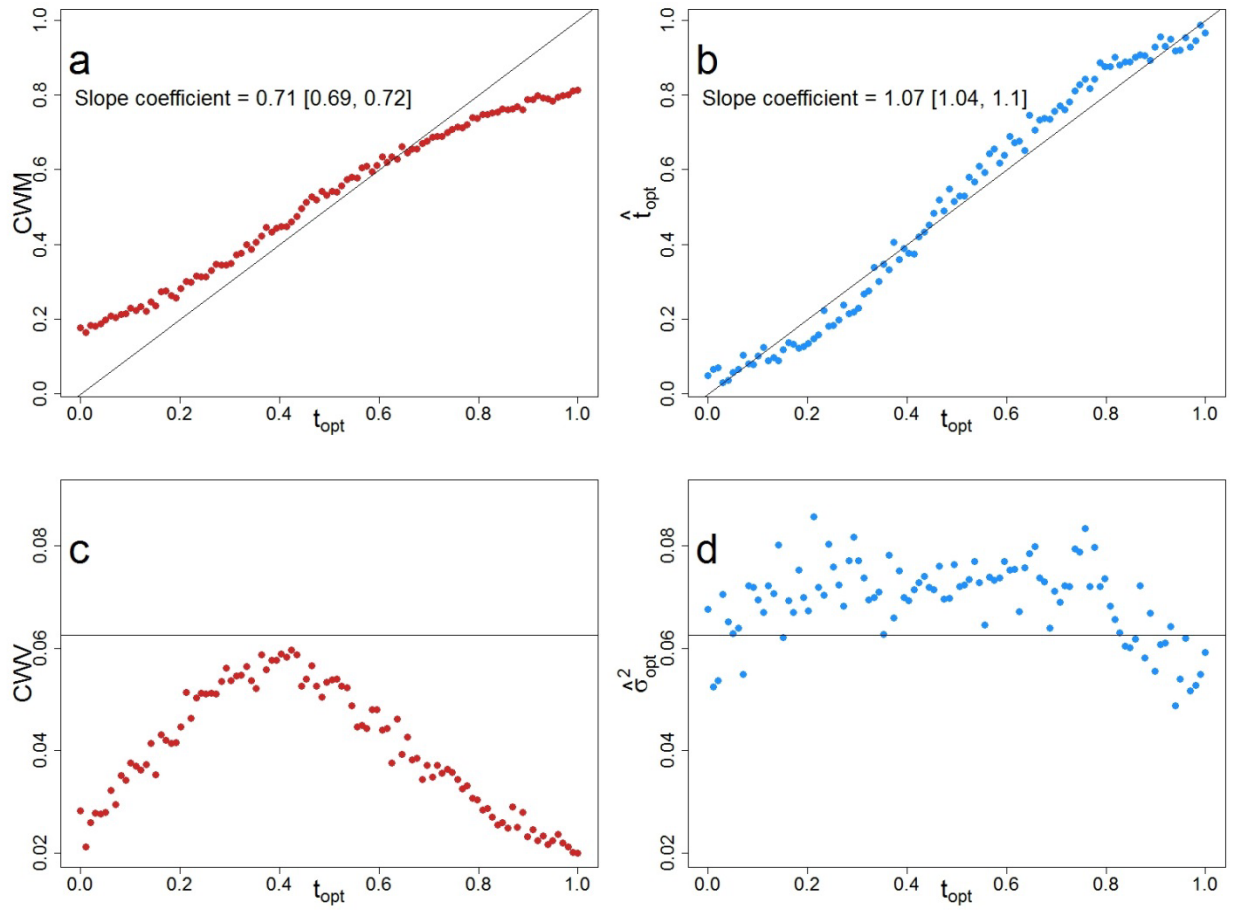

329

330
